# Supplementary material
Source: publisher figshare collection journal article supplement (https://diabetesjournals.figshare.com/ndownloader/files/26579123)
Supplement: Supplementary file 1 [file 26579123]

## Sheet: Genetic-instrument_info
ESM Table 1 - Genetic instrument information
Type-2 diabetes (Mahajan et al., 2018)						HbA1c (Wheeler et al., 2017)						Reaction time (Davies et al., 2018)
SNP	Gene	Chromosome	Position	Effect allele	Other allele	SNP	Gene	Chromosome	Position	Effect allele	Other allele	SNP	Gene	Chromosome	Position	Effect allele	Other allele
rs1005752	HMG20A	15	77818128	A	C	rs1046896	FN3KRP	17	80685533	T	C	rs10125715	KIF27	9	86528858	T	A
rs10096633	LPL	8	77818128	C	T	rs10774625	ATXN2	12	111910219	A	G	rs1032501	UBE2E2-AS1	3	23240671	C	G
rs10097617	TP53INP1	8	95961626	T	C	rs10823343	HK1	10	71091013	C	T	rs1054442	DDN	12	49389320	C	A
rs10193538	BNIPL	2	58981064	T	G	rs10830963	MTNR1B	11	92708710	A	G	rs10775404	KANSL1	17	44167366	C	A
rs10195252	GRB14/COBLL1	2	165513091	T	C	rs11086054	MYO9B	19	17246737	C	G	rs10804171	CBX3P6, KCNJ3	2	155777638	T	C
rs10228066	DGKB	7	15063569	T	C	rs11224302	CNTN5	11	100456604	G	A	rs10911301	NMNAT2	1	183282575	G	A
rs10406327	PEPD	19	33890838	C	G	rs11248914	ITFG3	16	293562	C	A	rs11205668	AGBL4	1	50416830	T	C
rs10406431	GIPR	19	46157019	A	G	rs11558471	SLC30A8	8	118185733	T	C	rs13219424	PTPRK	6	128332084	T	C
rs1042725	HMGA2	12	66358347	T	C	rs11603334	ARAP1	11	72432985	A	G	rs1351848	AC068858.1, PRDM11	11	45073858	T	C
rs1043246	ZZEF1	17	3828086	G	C	rs11619319	PDX1	13	28487599	A	G	rs1385253	AC107074.1	4	152749595	C	T
rs1061810	HSD17B12	11	43877934	A	C	rs11708067	ADCY5	3	123065778	A	G	rs141885450	LINC02392,AC126178.1	12	90559122	C	T
rs10811660	CDKN2A/B	9	22134068	G	A	rs11964178	C6orf183	6	109562035	A	G	rs1503043	LINC01982,CA10	17	50294365	G	C
rs10830963	MTNR1B	11	92708710	G	C	rs12621844	FOXN2	2	48414735	T	C	rs16822665	DPP4	2	162901327	T	C
rs10842994	KLHDC5	12	27965150	C	T	rs13134327	FREM3	4	144659795	T	C	rs16959783	SEMA6D,AC012050.1	15	47896550	T	C
rs10882101	HHEX/IDE	10	94462427	T	C	rs1467311	KLF4	9	110536932	A	G	rs1734197	AC040168.1	16	56215936	T	C
rs10893829	ETS1	11	128042575	T	C	rs1558902	FTO	16	53803574	C	T	rs2040879	AC004854.2,AC004854.1	7	44946241	C	T
rs10908278	HNF1B	17	36099952	T	A	rs174577	FADS2	11	61604814	G	A	rs2604268	AL513124.1,AL355674.1	9	76909386	T	C
rs10937721	WFS1	4	6306763	C	G	rs17509001	ATAD2B	2	24021231	G	A	rs264979	AC013727.1,AC018880.2	2	104269262	T	A
rs10974438	GLIS3	9	4291928	C	A	rs17533903	MYO9B	19	17256523	A	G	rs2869529	AC007744.1,CCDC85A	2	56472159	C	T
rs11070332	LTK	15	41809205	A	G	rs17747324	TCF7L2	10	114752503	T	C	rs323299	KIAA1328	18	34668147	T	G
rs1112718	HHEX/IDE	10	94479107	A	G	rs1800562	HFE	6	26093141	T	G	rs35066740	AC073091.4,AC073091.3	2	76459530	T	G
rs112498319	RREB1	6	7035734	C	A	rs198846	HFE	6	26107463	A	G	rs4627212	AL161423.1,LINC00374	13	58822051	G	A
rs11257655	CDC123/CAMK1D	10	12307894	T	C	rs2110073	PHB2	12	7075882	C	A	rs4673905	SPATS2L,AC004464.1	2	201163783	G	A
rs1127215	PTGFRN	1	117532790	C	T	rs2191349	DGKB	7	15064309	A	G	rs4852778	ZNF638	2	71544954	A	G
rs115505614	PAM	5	102422968	T	C	rs2375278	SYF2	1	25529038	T	C	rs4946935	FOXO3	6	109000742	G	A
rs11688682	GLI2	2	121347612	G	C	rs2383208	MTAP	9	22132076	T	C	rs56335290	APC,LINC02200	5	112036634	A	C
rs11688931	GLI2	2	121318166	C	G	rs2408955	SENP1	12	48499131	G	A	rs568039055	LRRC37A2,ARL17A	17	44632463	C	G
rs11699802	CEBPB	20	48832135	C	T	rs267738	CERS2	1	150940625	G	A	rs58984824	MED13L,AC079384.2	12	116771071	A	C
rs11708067	ADCY5	3	123065778	A	G	rs282587	ATP11A	13	113351662	T	G	rs61786416	PTBP2	1	97283538	G	A
rs11709077	PPARG	3	12336507	G	A	rs3782123	BET1L	11	205198	A	G	rs62074125	WNT3	17	44852612	C	A
rs11759026	CENPW	6	126792095	G	A	rs3824065	GCK	7	44247258	C	T	rs648997	ATXN2	12	111976776	T	C
rs11820019	CCND1	11	69448758	T	C	rs4607517	GCK	7	44235668	C	T	rs66534382	ZBTB7A	19	4056366	A	G
rs11967262	VEGFA	6	43760327	G	C	rs4737009	ANK1	8	41630405	G	A	rs6870103	PFDN1,HBEGF	5	139692515	T	G
rs12454712	BCL2A	18	60845884	T	C	rs4745982	HK1	10	71089843	A	T	rs7075591	ARID5B	10	63670814	A	G
rs1260326	GCKR	2	27730940	C	T	rs4783565	CDH3	16	68750190	T	G	rs73464507	PRDM11	11	45123931	C	G
rs12642790	SCD5	4	83578271	A	G	rs4820268	TMPRSS6	22	37469591	T	C	rs75543711	YWHAE	17	1256074	A	G
rs12811407	FBRSL1	12	133069698	A	G	rs4894799	FNDC3B	3	171795540	G	A	rs7598246	METAP1D	2	172866359	C	T
rs12910825	PRC1	15	91511260	G	A	rs560887	G6PC2	2	169763148	A	G	rs7783359	AC006148.1	7	123689194	A	T
rs13085136	SHQ1	3	72865183	C	T	rs579459	ABO	9	136154168	A	G	rs77917390	NREP	5	111134058	A	T
rs1316776	DMGDH	5	78430607	C	A	rs592423	CITED2	6	139840693	A	G	rs77998199	OLA1,RPSAP24	2	174928752	G	A
rs13262861	ANK1	8	41508577	C	A	rs6474359	ANK1	8	41549194	A	G	rs7936413	DGKZ	11	46393958	C	T
rs1359790	SPRY2	13	80717156	G	A	rs6980507	SLC20A2	8	42383084	T	C	rs80054135	AC073114.1	7	109777798	T	A
rs13737	PTPN9	15	75932129	G	T	rs7040409	C9orf47	9	91503236	A	G	rs925229	MFSD2B	2	24234440	G	A
rs1377807	ZZEF1	17	4045440	C	G	rs7616006	SYN2	3	12267648	A	T	rs936414	KCNC2	12	75548466	G	A
rs1412234	LINGO2	9	28410683	C	T	rs7756992	CDKAL1	6	20679709	T	G
rs1412830	CDKN2A/B	9	22043612	C	T	rs8192675	SLC2A2	3	170724883	C	T
rs1421085	FTO	16	53800954	C	T	rs837763	CDT1	16	88853729	G	A
rs1426371	WSCD2	12	108629780	G	A	rs857691	SPTA1	1	158626378	G	C
rs148766658	ANK1	8	41552046	C	T	rs9604573	GAS6	13	114542858	G	A
rs1493694	NOTCH2	1	120526982	T	C	rs9818758	USP4	3	49382925	C	T
rs1531583	PCGF3	4	744972	T	G	rs9914988	ERAL1	17	27183104	A	C
rs1562396	KLF14	7	130457914	G	A
rs1708302	JAZF1	7	28198677	C	T
rs17168486	DGKB	7	14898282	T	C
rs17250977	ANKH	5	14753745	G	A
rs17689007	MSRA	8	9974824	G	A
rs177045	NEUROG3	10	71321279	G	A
rs17791513	TLE4	9	81905590	A	G
rs1783541	MAP3K11	11	65294799	T	C
rs17836088	NRXN3	14	79932041	C	G
rs1796330	TSPAN8/LGR5	12	71522953	G	C
rs1800574	HNF1A	12	121416864	T	C
rs1800961	HNF4A	20	43042364	T	C
rs1801212	WFS1	4	6302519	A	G
rs1801645	PIM3	22	50356850	C	T
rs180988137	TCF7L2	10	114751173	G	A
rs184509201	TCF7L2	10	114740337	C	G
rs2028150	CEP68	2	65655012	C	G
rs2197973	USP44	12	95928560	T	C
rs2237895	KCNQ1	11	2857194	C	A
rs2237897	KCNQ1	11	2858546	C	T
rs2238689	GIPR	19	46178661	C	T
rs2249105	CEP68	2	65287896	A	G
rs2258238	HMGA2	12	66221060	T	A
rs2283220	KCNQ1	11	2755548	A	G
rs2307111	POC5	5	75003678	T	C
rs231361	KCNQ1	11	2691500	A	G
rs243024	BCL11A	2	60583665	A	G
rs2456530	ONECUT1	15	53091553	T	C
rs2642588	NEUROG3	10	71466578	G	T
rs2796441	TLE1	9	84308948	G	A
rs2800733	SOGA3	6	127416930	A	G
rs2820446	LYPLAL1	1	219748818	C	G
rs28505901	GPSM1	9	139241030	G	A
rs2972144	IRS1	2	227101411	G	A
rs3111316	FARSA	19	13038415	A	G
rs3217792	CCND2	12	4384696	C	T
rs3217860	CCND2	12	4399050	G	A
rs340874	PROX1	1	214159256	C	T
rs34715063	RASGRP1	15	38873115	C	T
rs348330	ABCB10	1	229672955	G	A
rs34855406	MLX	17	40731411	C	G
rs35352848	UBE2E2	3	23455582	T	C
rs35895680	TTLL6	17	47060322	C	A
rs35913461	TMEM18	2	653575	C	T
rs3768321	MACF1	1	40035928	T	G
rs3774723	PSMD6	3	63962339	G	A
rs3798519	TFAP2B	6	50788778	C	A
rs3802177	SLC30A8	8	118185025	G	A
rs3810291	ZC3H4	19	47569003	A	G
rs3887925	ST6GAL1	3	186665645	T	C
rs41277236	NEUROG3	10	71332301	T	C
rs4238013	CCND2	12	4376089	C	T
rs429358	TOMM40/APOE	19	45411941	T	C
rs4457053	ZBED3	5	76424949	G	A
rs465002	ANKRD55	5	55808475	T	C
rs4686471	LPP	3	187740899	C	T
rs4688760	RBM6	3	49980596	T	C
rs4709746	QKI	6	164133001	C	T
rs4736819	ANK1	8	41509915	T	C
rs474513	SLC22A3	6	160770312	A	G
rs4804833	MAP2K7	19	7970635	A	G
rs4810426	HNF4A	20	43001721	T	C
rs4929965	INS/IGF2	11	2197286	A	G
rs4932265	AP3S2	15	90423293	T	C
rs4977213	BOP1	8	145507304	C	T
rs5213	KCNJ11	11	17408404	C	T
rs523288	MC4R	18	57848369	T	A
rs539515	SEC16B	1	177889025	C	A
rs56337234	MAEA	4	1784403	C	T
rs56348580	HNF1A	12	121432117	G	C
rs57235767	MTNR1B	11	93013531	C	T
rs58730668	ACSL1	4	185717759	T	C
rs601945	MHC	6	32573415	G	A
rs6070625	GNAS	20	57394628	G	C
rs62107261	TMEM18	2	422144	T	C
rs62492368	AOC1	7	150537635	A	G
rs6458354	VEGFA	6	43814190	C	T
rs6459733	MNX1	7	156930550	G	C
rs6518681	MTMR3/ASCC2	22	30609554	G	A
rs6600191	ITFG3	16	295795	T	C
rs67232546	ETS1	11	128398938	T	C
rs6780171	IGF2BP2	3	185503456	A	T
rs6885132	ANKH	5	14768092	C	G
rs7022807	HAUS6	9	19067833	G	A
rs702634	ARL15	5	53271420	A	G
rs703972	ZMIZ1	10	80952826	G	C
rs7078559	HHEX/IDE	10	93924663	T	C
rs7178762	USP3	15	63871292	C	T
rs718314	ITPR2	12	26453283	G	A
rs72802342	BCAR1	16	75234872	C	A
rs72926932	TCF4	18	53050646	C	A
rs738408	PNPLA3	22	44324730	T	C
rs74653713	MBNL1	3	152417881	C	A
rs76011118	CDKN2A/B	9	22133773	A	G
rs7669833	TMEM154	4	153513369	T	A
rs76895963	CCND2	12	4384844	T	G
rs77464186	CENTD2/ARAP1	11	72460398	A	C
rs7756992	CDKAL1	6	20679709	G	A
rs78025551	TCF7L2	10	114757956	C	G
rs7903146	TCF7L2	10	114758349	T	C
rs79687284	PROX1	1	214150821	C	G
rs80147536	THADA	2	43698028	A	T
rs8037894	C2CD4A/B	15	62394264	G	C
rs8107974	TM6SF2	19	19388500	T	A
rs862320	NFAT5	16	69651866	C	T
rs878521	GCK	7	44255643	A	G
rs9379084	RREB1	6	7231843	G	A
rs9563615	SRGAP2D	13	59077406	A	T
rs9569864	PCDH17	13	58965435	C	T
rs9687832	ANKRD55	5	55861595	A	G
rs9860730	ADAMTS9	3	64701146	A	G
rs9873618	SLC2A2	3	170733076	G	A

## Sheet: Sample characteristics
ESM Table 2 - Sample characteristics
	Mean (SD) / N (%)
Age (years)	56.7 (8.0)
Sex (Male)	188,636 (54)
Deprivation
Least deprived	56,349 (20)
Most deprived	56,264 (20)
Smoking
Ever	93916 (27)
Physical activity (number of days)±	3.6 (2.3)
HbA1c (mmol/mol)	35.9 (6.3)
HbA1c (%)	5.4 (0.5)
Reaction time (ms)	554.6 (110.9)
Visual memory (errors)	4.1 (3.3)
Hippocampal volume (mm3)	3830.0 (433.4)
White matter hyperintensity volume (mm3)*	2824 (4261)
Body Mass Index (kg/m2)	27.3 (4.7)
Systolic blood pressure (mmHg)	138.2 (18.7)
Triglycerides (mmol/mol)*	1.5 (1.11)
Total cholesterol (mmol/mol)	5.7 (1.1)
C-Reactive protein (mg/l)*	1.3 (2.0)
Diabetes	14,010 (4)
Stroke	6301 (1.8)
*Median (IQR)
±Number of days per week of moderate physical activity for >10 minutes

## Sheet: T2D_SNPs_confounders
ESM Table 3 - Associations between 163 diabetes SNPs and confounders
	Deprivation				BMI				SBP				Total cholesterol				Smoking				Stroke				Triglycerides				CRP
SNP	Beta	SE	P-value	BH-significance	Beta	SE	P-value	BH-significance	Beta	SE	P-value	BH-significance	Beta	SE	P-value	BH-significance	OR	SE	P-value	BH-significance	OR	SE	P-value	BH-significance	Beta	SE	P-value	BH-significance	Beta	SE	P-value	BH-significance
rs1005752	-0.0084	0.0085	0.3255	Not significant	-0.0115	0.0127	0.3631	Not significant	0.0521	0.0573	0.3632	Not significant	0.0029	0.0031	0.3408	Not significant	1.006	0.0065	0.3599	Not significant	0.9781	0.0199	0.2661	Not significant	0.0005	0.0026	0.8421	Not significant	0.005	0.01	0.6509	Not significant
rs10096633	-0.0049	0.0116	0.6734	Not significant	0.0074	0.0165	0.656	Not significant	0.0272	0.0602	0.6511	Not significant	0.0025	0.0049	0.6119	Not significant	1.0027	0.0057	0.6386	Not significant	0.9745	0.027	0.3392	Not significant	-0.0026	0.0035	0.4551	Not significant	0.0084	0.0151	0.5771	Not significant
rs10097617	-0.0117	0.0077	0.1269	Not significant	0.0253	0.0177	0.1518	Not significant	0.0835	0.0512	0.1027	Not significant	-0.0059	0.004	0.1367	Not significant	0.989	0.0064	0.08469	Not significant	1.0016	0.018	0.9281	Not significant	0.0011	0.0023	0.6399	Not significant	0.0005	0.0099	0.9561	Not significant
rs10193538	0.0038	0.0079	0.628	Not significant	-0.0068	0.0133	0.6114	Not significant	-0.0332	0.0658	0.6142	Not significant	-0.0062	0.0112	0.5766	Not significant	0.9971	0.0057	0.6054	Not significant	1.0061	0.0185	0.7437	Not significant	-0.0014	0.0024	0.5576	Not significant	0.0044	0.0102	0.6695	Not significant
rs10195252	0.0011	0.0078	0.8883	Not significant	0.002	0.0137	0.8831	Not significant	0.0065	0.052	0.8998	Not significant	-0.0007	0.0037	0.8491	Not significant	1.001	0.007	0.8913	Not significant	1.0101	0.0183	0.5827	Not significant	-0.0004	0.0024	0.8769	Not significant	0.0067	0.0101	0.5086	Not significant
rs10228066	-0.0026	0.0077	0.7327	Not significant	0.0092	0.0246	0.7071	Not significant	-0.0209	0.0548	0.7028	Not significant	-0.0012	0.003	0.6834	Not significant	1.0025	0.0075	0.7349	Not significant	1.0186	0.0181	0.3079	Not significant	-0.0023	0.0023	0.327	Not significant	0.0012	0.01	0.9072	Not significant
rs10406327	0.0053	0.0077	0.4935	Not significant	0.0074	0.0125	0.5567	Not significant	0.05	0.0822	0.5431	Not significant	-0.002	0.0031	0.517	Not significant	1.0088	0.0144	0.5453	Not significant	1.0113	0.018	0.5318	Not significant	-0.0008	0.0023	0.7167	Not significant	0.0139	0.0099	0.1616	Not significant
rs10406431	-0.0147	0.0077	0.05645	Not significant	-0.0393	0.0227	0.08281	Not significant	0.1237	0.0685	0.07091	Not significant	0.0172	0.0096	0.07277	Not significant	0.9823	0.0085	0.03532	Not significant	1.0149	0.0181	0.4118	Not significant	0.002	0.0023	0.3856	Not significant	0.0185	0.01	0.0638	Not significant
rs1042725	-0.0068	0.0077	0.3742	Not significant	0.0133	0.0157	0.394	Not significant	0.0542	0.0645	0.401	Not significant	0.0029	0.0033	0.3913	Not significant	0.9953	0.0058	0.4173	Not significant	1.0377	0.018	0.03954	Not significant	0.0051	0.0023	0.02813	Not significant	0.0234	0.0099	0.01842	Not significant
rs1043246	0.0069	0.0105	0.5122	Not significant	-0.0079	0.0141	0.5771	Not significant	0.051	0.0903	0.5722	Not significant	0.0032	0.0052	0.5326	Not significant	0.9968	0.0058	0.5808	Not significant	0.9987	0.0246	0.9571	Not significant	-0.0027	0.0032	0.3879	Not significant	0.0084	0.0136	0.5341	Not significant
rs1061810	0.0103	0.0084	0.2199	Not significant	0.0148	0.0132	0.2629	Not significant	0.0651	0.0562	0.2466	Not significant	0.0082	0.0071	0.2455	Not significant	0.9925	0.0062	0.2248	Not significant	0.9847	0.0198	0.4383	Not significant	-0.0007	0.0026	0.7809	Not significant	0.0139	0.0109	0.2032	Not significant
rs10811660	-0.0224	0.0101	0.02667	Not significant	0.0287	0.0151	0.05802	Not significant	-0.1092	0.0536	0.04163	Not significant	0.0059	0.0031	0.05364	Not significant	1.0136	0.006	0.0256	Not significant	1.0026	0.0237	0.9136	Not significant	-0.0025	0.0031	0.4111	Not significant	0.0074	0.0131	0.5724	Not significant
rs10830963	0.014	0.0086	0.1023	Not significant	-0.0194	0.0129	0.1343	Not significant	0.1434	0.086	0.09567	Not significant	0.0052	0.0033	0.1159	Not significant	1.0107	0.0059	0.07058	Not significant	1.0015	0.0201	0.9388	Not significant	-0.0013	0.0026	0.6273	Not significant	0.0074	0.0111	0.5066	Not significant
rs10842994	-0.0027	0.0096	0.7823	Not significant	-0.0057	0.0193	0.7688	Not significant	0.0161	0.0505	0.7501	Not significant	-0.0012	0.0034	0.715	Not significant	0.9984	0.0057	0.7754	Not significant	1.0209	0.0227	0.3624	Not significant	-0.0038	0.0029	0.1921	Not significant	0.0165	0.0124	0.1858	Not significant
rs10882101	-0.0092	0.0078	0.235	Not significant	0.0154	0.0139	0.2679	Not significant	-0.0668	0.0577	0.2471	Not significant	0.004	0.0035	0.2496	Not significant	0.9934	0.0057	0.2395	Not significant	1.0059	0.0183	0.7486	Not significant	-0.0006	0.0024	0.8073	Not significant	0.0076	0.0101	0.4508	Not significant
rs10893829	0.0054	0.011	0.6205	Not significant	-0.018	0.0334	0.5905	Not significant	0.043	0.0851	0.6135	Not significant	0.0019	0.0033	0.5681	Not significant	1.003	0.0057	0.6031	Not significant	1.023	0.0259	0.3808	Not significant	0.0017	0.0033	0.6057	Not significant	-0.0021	0.0142	0.8837	Not significant
rs10908278	0.0027	0.0077	0.7233	Not significant	0.0129	0.0317	0.6834	Not significant	-0.0225	0.0518	0.6641	Not significant	0.003	0.0069	0.6618	Not significant	0.9978	0.0061	0.7149	Not significant	0.9989	0.0181	0.9532	Not significant	0.0005	0.0023	0.8345	Not significant	0.0232	0.01	0.01969	Not significant
rs10937721	0.0014	0.0078	0.8555	Not significant	-0.0023	0.0138	0.8666	Not significant	0.0087	0.0577	0.8806	Not significant	0.0007	0.003	0.8123	Not significant	0.9989	0.0066	0.8659	Not significant	0.9799	0.0183	0.2674	Not significant	-0.0032	0.0024	0.1845	Not significant	0.0023	0.0101	0.8194	Not significant
rs10974438	-0.0115	0.008	0.153	Not significant	0.0165	0.0131	0.2078	Not significant	0.0698	0.0497	0.1604	Not significant	-0.0043	0.0031	0.168	Not significant	0.9922	0.0057	0.1727	Not significant	0.9871	0.0189	0.4902	Not significant	-0.0032	0.0024	0.1839	Not significant	-0.0059	0.0104	0.5699	Not significant
rs11070332	0.008	0.0081	0.3208	Not significant	-0.0332	0.0357	0.3524	Not significant	0.0467	0.0514	0.363	Not significant	-0.0032	0.0034	0.3366	Not significant	0.9945	0.0058	0.3338	Not significant	0.9784	0.019	0.2503	Not significant	0.002	0.0024	0.4143	Not significant	0.0035	0.0104	0.7368	Not significant
rs1112718	-0.0052	0.0078	0.505	Not significant	-0.015	0.0258	0.5619	Not significant	0.0293	0.0499	0.5569	Not significant	-0.0024	0.0038	0.5215	Not significant	0.9903	0.0162	0.5504	Not significant	1.0206	0.0183	0.2655	Not significant	-0.0009	0.0024	0.7133	Not significant	0.0021	0.0101	0.8329	Not significant
rs112498319	-0.0123	0.0078	0.1171	Not significant	-0.0185	0.0128	0.1483	Not significant	0.0861	0.0526	0.1017	Not significant	-0.0047	0.003	0.1229	Not significant	0.99	0.0058	0.0829	Not significant	0.9927	0.0184	0.6901	Not significant	0.0008	0.0024	0.744	Not significant	0.0001	0.0102	0.9936	Not significant
rs11257655	0.014	0.0094	0.1374	Not significant	0.0235	0.0172	0.1711	Not significant	-0.2154	0.1475	0.1441	Not significant	0.0062	0.0043	0.1502	Not significant	0.9892	0.0074	0.1414	Not significant	0.9737	0.0223	0.2308	Not significant	0.0001	0.0029	0.9636	Not significant	-0.0085	0.0122	0.4875	Not significant
rs1127215	-0.0054	0.0077	0.4825	Not significant	0.0083	0.0139	0.5516	Not significant	0.0312	0.0503	0.5352	Not significant	0.0021	0.0031	0.503	Not significant	1.0041	0.0066	0.5305	Not significant	0.9925	0.0182	0.6775	Not significant	0.0025	0.0024	0.2883	Not significant	-0.0084	0.01	0.4036	Not significant
rs115505614	0.0024	0.0175	0.8916	Not significant	-0.0022	0.0151	0.8854	Not significant	0.0172	0.1424	0.9037	Not significant	-0.0005	0.0031	0.8612	Not significant	0.9992	0.0062	0.8943	Not significant	0.9542	0.0419	0.2639	Not significant	-0.0016	0.0053	0.7648	Not significant	0.0008	0.0227	0.9729	Not significant
rs11688682	0.001	0.0089	0.9106	Not significant	-0.0016	0.0139	0.9061	Not significant	0.0028	0.0502	0.9552	Not significant	0.0006	0.0042	0.8861	Not significant	0.9993	0.0059	0.909	Not significant	1.0103	0.0209	0.626	Not significant	0.0041	0.0027	0.1305	Not significant	-0.0069	0.0115	0.5466	Not significant
rs11688931	-0.0034	0.0107	0.749	Not significant	-0.0107	0.0292	0.7129	Not significant	-0.0193	0.0567	0.7338	Not significant	-0.0032	0.0083	0.6965	Not significant	1.002	0.0061	0.7416	Not significant	1.0275	0.0252	0.2822	Not significant	-0.0018	0.0032	0.5713	Not significant	-0.0136	0.0138	0.3259	Not significant
rs11699802	-0.0052	0.0077	0.4993	Not significant	-0.0085	0.0145	0.557	Not significant	-0.0326	0.0539	0.5454	Not significant	-0.002	0.0031	0.521	Not significant	1.004	0.0066	0.5471	Not significant	1.0129	0.0181	0.4792	Not significant	0.0002	0.0023	0.9342	Not significant	0.0078	0.01	0.4343	Not significant
rs11708067	0.0016	0.0089	0.8553	Not significant	-0.0054	0.0316	0.8642	Not significant	-0.0205	0.1352	0.8796	Not significant	0.0008	0.0035	0.81	Not significant	1.001	0.0057	0.8606	Not significant	1.0147	0.021	0.4848	Not significant	0.0016	0.0027	0.565	Not significant	-0.0142	0.0115	0.2171	Not significant
rs11709077	-0.0043	0.0118	0.7166	Not significant	0.0057	0.0137	0.679	Not significant	0.0277	0.063	0.66	Not significant	-0.0017	0.0036	0.6468	Not significant	1.0022	0.0057	0.7038	Not significant	0.9566	0.0273	0.1036	Not significant	0.0013	0.0036	0.7213	Not significant	-0.0105	0.0153	0.4941	Not significant
rs11759026	-0.0051	0.0092	0.5791	Not significant	-0.0101	0.0187	0.5895	Not significant	-0.0272	0.0533	0.6098	Not significant	0.0019	0.0032	0.5626	Not significant	0.995	0.0097	0.6025	Not significant	1.0136	0.0214	0.5289	Not significant	0.0049	0.0028	0.07725	Not significant	-0.008	0.0119	0.4982	Not significant
rs11820019	0.0031	0.0243	0.8978	Not significant	-0.002	0.0144	0.891	Not significant	0.0277	0.2515	0.9122	Not significant	0.0005	0.0031	0.8702	Not significant	1.0019	0.0154	0.9038	Not significant	1.0466	0.0583	0.4349	Not significant	0.0059	0.0074	0.4254	Not significant	-0.0372	0.0315	0.2381	Not significant
rs11967262	0.0085	0.0077	0.2657	Not significant	0.0161	0.015	0.2839	Not significant	-0.0574	0.0521	0.2705	Not significant	0.0037	0.0033	0.2619	Not significant	1.0097	0.0084	0.2501	Not significant	0.9954	0.018	0.798	Not significant	0.0006	0.0023	0.7959	Not significant	0.0033	0.0099	0.7386	Not significant
rs12454712	0.0084	0.0079	0.2866	Not significant	0.0143	0.0137	0.2963	Not significant	0.0546	0.0512	0.2866	Not significant	0.0034	0.0031	0.2715	Not significant	0.9936	0.0057	0.2554	Not significant	0.9878	0.0185	0.5082	Not significant	0.0036	0.0024	0.1376	Not significant	-0.017	0.0102	0.09703	Not significant
rs1260326	-0.0055	0.0078	0.4852	Not significant	0.0074	0.0125	0.5559	Not significant	0.0434	0.0712	0.5426	Not significant	-0.0027	0.004	0.5082	Not significant	0.9965	0.0057	0.5437	Not significant	1.0055	0.0184	0.7661	Not significant	-0.005	0.0024	0.03719	Not significant	0.0112	0.0101	0.2698	Not significant
rs12642790	-0.0016	0.0081	0.846	Not significant	-0.0039	0.0162	0.8095	Not significant	0.0192	0.1029	0.8521	Not significant	-0.0008	0.0031	0.7913	Not significant	1.001	0.0058	0.8592	Not significant	1.0036	0.019	0.8494	Not significant	-0.0002	0.0025	0.9196	Not significant	0.0156	0.0105	0.1375	Not significant
rs12811407	0.0068	0.0081	0.4032	Not significant	-0.0092	0.0126	0.4657	Not significant	0.0628	0.08	0.4324	Not significant	0.0025	0.003	0.4097	Not significant	0.9958	0.0058	0.4663	Not significant	1.0212	0.019	0.2704	Not significant	-0.0007	0.0025	0.7872	Not significant	-0.0066	0.0105	0.5298	Not significant
rs12910825	-0.0014	0.008	0.864	Not significant	-0.0024	0.0145	0.8706	Not significant	0.0087	0.0623	0.8889	Not significant	0.0007	0.0033	0.8242	Not significant	1.0012	0.007	0.8661	Not significant	1.0217	0.0187	0.2511	Not significant	0.002	0.0024	0.4204	Not significant	-0.012	0.0103	0.2453	Not significant
rs13085136	-0.0019	0.0151	0.9001	Not significant	-0.0025	0.0184	0.8937	Not significant	0.0137	0.1578	0.9307	Not significant	0.0006	0.0042	0.8818	Not significant	0.9974	0.0218	0.9063	Not significant	0.9938	0.0354	0.8603	Not significant	0.0011	0.0046	0.8113	Not significant	-0.0009	0.0196	0.9635	Not significant
rs1316776	-0.008	0.008	0.3188	Not significant	-0.032	0.0339	0.3456	Not significant	-0.1256	0.1331	0.3452	Not significant	0.0037	0.0037	0.3133	Not significant	0.9919	0.0078	0.2947	Not significant	0.9977	0.0189	0.903	Not significant	0.0019	0.0024	0.4351	Not significant	-0.0108	0.0104	0.2972	Not significant
rs13262861	0.0032	0.0102	0.754	Not significant	0.0046	0.0138	0.7417	Not significant	-0.0254	0.0755	0.7369	Not significant	0.0012	0.0031	0.7068	Not significant	0.998	0.0062	0.7517	Not significant	1.0313	0.0242	0.2032	Not significant	0.0001	0.0031	0.9697	Not significant	0.006	0.0132	0.6479	Not significant
rs1359790	0.0034	0.0085	0.6913	Not significant	-0.0068	0.0154	0.6576	Not significant	0.0281	0.0624	0.6522	Not significant	0.002	0.004	0.6184	Not significant	0.9958	0.0098	0.6658	Not significant	0.9902	0.0198	0.6171	Not significant	-0.0015	0.0026	0.571	Not significant	-0.0115	0.0109	0.2936	Not significant
rs13737	0.0068	0.0089	0.4415	Not significant	-0.0105	0.0165	0.5234	Not significant	-0.0345	0.0499	0.4892	Not significant	0.0026	0.0033	0.4319	Not significant	0.9947	0.0078	0.4907	Not significant	0.9797	0.0207	0.3223	Not significant	0.0024	0.0027	0.3669	Not significant	0.0098	0.0115	0.3932	Not significant
rs1377807	0.0012	0.0082	0.8872	Not significant	0.0019	0.013	0.8813	Not significant	-0.0071	0.0552	0.8978	Not significant	0.0009	0.0045	0.848	Not significant	0.9992	0.0057	0.8892	Not significant	0.9966	0.0194	0.8606	Not significant	0.0041	0.0025	0.09975	Not significant	-0.0043	0.0107	0.685	Not significant
rs1412234	0.0085	0.0082	0.2961	Not significant	0.0129	0.0127	0.3097	Not significant	0.0588	0.0573	0.3051	Not significant	-0.0128	0.0117	0.2769	Not significant	1.0196	0.0174	0.2628	Not significant	0.9971	0.0192	0.8807	Not significant	-0.0001	0.0025	0.9757	Not significant	-0.0141	0.0106	0.1837	Not significant
rs1412830	0.0091	0.0079	0.2511	Not significant	0.014	0.0127	0.2687	Not significant	0.0607	0.054	0.261	Not significant	0.004	0.0035	0.2535	Not significant	1.0068	0.0058	0.2423	Not significant	0.9536	0.0185	0.01038	Not significant	0.0018	0.0024	0.4602	Not significant	0.0074	0.0103	0.4692	Not significant
rs1421085	-0.0109	0.0078	0.1612	Not significant	-0.0194	0.0154	0.2079	Not significant	0.0812	0.0598	0.1746	Not significant	0.0045	0.0033	0.169	Not significant	1.0084	0.0063	0.1806	Not significant	0.9829	0.0183	0.346	Not significant	-0.0012	0.0024	0.6117	Not significant	0.0037	0.0101	0.7169	Not significant
rs1426371	-0.0022	0.0088	0.8065	Not significant	-0.0033	0.013	0.8016	Not significant	-0.013	0.0548	0.812	Not significant	-0.001	0.0035	0.7712	Not significant	0.998	0.0094	0.8265	Not significant	0.9932	0.0206	0.7414	Not significant	-0.0001	0.0027	0.9821	Not significant	0.0023	0.0114	0.8404	Not significant
rs148766658	0.0306	0.0209	0.143	Not significant	-0.0171	0.0126	0.1752	Not significant	0.0724	0.0497	0.1451	Not significant	0.0043	0.003	0.1544	Not significant	1.0091	0.0062	0.147	Not significant	1.0363	0.0482	0.4603	Not significant	0.0111	0.0063	0.08065	Not significant	0.024	0.027	0.3741	Not significant
rs1493694	0.0116	0.0123	0.3479	Not significant	-0.0286	0.0323	0.3751	Not significant	0.0489	0.0548	0.3724	Not significant	-0.0028	0.0031	0.3624	Not significant	1.0135	0.0154	0.3837	Not significant	0.9926	0.029	0.7975	Not significant	-0.0009	0.0037	0.8108	Not significant	0.0223	0.016	0.1623	Not significant
rs1531583	0.0124	0.0198	0.5332	Not significant	0.0068	0.0125	0.5832	Not significant	-0.0446	0.0842	0.5958	Not significant	0.002	0.0033	0.5526	Not significant	1.0044	0.0082	0.5897	Not significant	1.0207	0.046	0.657	Not significant	-0.0028	0.006	0.6389	Not significant	-0.0092	0.0256	0.719	Not significant
rs1562396	-0.0124	0.0082	0.1325	Not significant	0.0175	0.0125	0.1604	Not significant	-0.0787	0.0516	0.127	Not significant	-0.0046	0.0031	0.1402	Not significant	1.012	0.0078	0.1287	Not significant	0.9925	0.0194	0.6957	Not significant	-0.0047	0.0025	0.06063	Not significant	-0.0129	0.0107	0.2271	Not significant
rs1708302	0.0079	0.0076	0.3022	Not significant	-0.0144	0.0144	0.3183	Not significant	-0.062	0.0615	0.3131	Not significant	0.0042	0.0041	0.309	Not significant	0.9938	0.0058	0.2824	Not significant	1.0186	0.018	0.3042	Not significant	0	0.0023	0.9966	Not significant	-0.0154	0.0099	0.1191	Not significant
rs17168486	-0.0058	0.0101	0.5687	Not significant	0.007	0.0128	0.5859	Not significant	-0.0268	0.0509	0.5989	Not significant	0.0046	0.0078	0.5532	Not significant	1.0036	0.0068	0.5929	Not significant	0.9447	0.0242	0.01876	Not significant	-0.0072	0.0031	0.01858	Not significant	-0.0186	0.0131	0.157	Not significant
rs17250977	-0.0073	0.0196	0.7094	Not significant	0.0058	0.0136	0.6679	Not significant	-0.0221	0.0499	0.6581	Not significant	0.0014	0.003	0.6353	Not significant	1.0026	0.0064	0.6904	Not significant	0.9571	0.0468	0.3493	Not significant	0.0015	0.0059	0.7961	Not significant	0.002	0.0253	0.9377	Not significant
rs17689007	0.0104	0.0077	0.1761	Not significant	0.0159	0.0133	0.2326	Not significant	0.1001	0.08	0.2105	Not significant	-0.0046	0.0037	0.2067	Not significant	1.0072	0.0057	0.202	Not significant	1.028	0.0181	0.1257	Not significant	-0.0003	0.0023	0.9053	Not significant	0.0035	0.0099	0.7272	Not significant
rs177045	-0.0062	0.0083	0.4544	Not significant	0.0075	0.0125	0.5456	Not significant	-0.0848	0.1257	0.4999	Not significant	-0.0044	0.0063	0.4852	Not significant	0.9948	0.008	0.5136	Not significant	1.0062	0.0195	0.7526	Not significant	-0.0013	0.0025	0.6024	Not significant	-0.0194	0.0108	0.0724	Not significant
rs17791513	-0.0067	0.0159	0.6746	Not significant	-0.007	0.0158	0.6564	Not significant	-0.0277	0.0612	0.6511	Not significant	0.0024	0.0049	0.618	Not significant	1.0027	0.0062	0.6648	Not significant	0.9707	0.0368	0.4185	Not significant	-0.0025	0.0048	0.6054	Not significant	-0.0233	0.0205	0.2573	Not significant
rs1783541	0.0042	0.0093	0.6499	Not significant	0.0063	0.0134	0.6358	Not significant	0.0334	0.0691	0.6293	Not significant	0.0017	0.0031	0.5859	Not significant	1.003	0.0062	0.6209	Not significant	1.0537	0.0215	0.01484	Not significant	-0.0035	0.0028	0.2108	Not significant	0.0164	0.012	0.1715	Not significant
rs17836088	0.0061	0.0092	0.5068	Not significant	0.0278	0.0483	0.5658	Not significant	-0.0652	0.1137	0.5663	Not significant	0.0021	0.0034	0.523	Not significant	0.9959	0.0072	0.5707	Not significant	1.0262	0.0215	0.2291	Not significant	-0.0039	0.0028	0.1633	Not significant	0.0062	0.0119	0.6051	Not significant
rs1796330	-0.0027	0.0077	0.7292	Not significant	-0.0053	0.0136	0.6936	Not significant	-0.0203	0.0523	0.6972	Not significant	-0.0016	0.0037	0.6713	Not significant	1.0021	0.0057	0.7163	Not significant	0.96	0.0181	0.02399	Not significant	0.0013	0.0023	0.5755	Not significant	-0.0129	0.01	0.1985	Not significant
rs1800574	0.0237	0.0227	0.2973	Not significant	-0.0132	0.013	0.3099	Not significant	0.1857	0.1837	0.3119	Not significant	0.0082	0.0077	0.2863	Not significant	0.9932	0.0062	0.2678	Not significant	0.9742	0.0538	0.6273	Not significant	0.0008	0.0069	0.9079	Not significant	-0.0203	0.0294	0.4887	Not significant
rs1800961	-0.0335	0.022	0.1271	Not significant	0.0195	0.0137	0.1545	Not significant	0.081	0.0497	0.1027	Not significant	-0.0047	0.0032	0.139	Not significant	1.0303	0.0181	0.09933	Not significant	0.9879	0.0517	0.8145	Not significant	-0.0027	0.0067	0.6901	Not significant	0.0072	0.0284	0.7988	Not significant
rs1801212	0.0055	0.0085	0.5156	Not significant	0.0095	0.0171	0.5778	Not significant	-0.0278	0.0511	0.587	Not significant	0.002	0.0033	0.5369	Not significant	0.9968	0.0058	0.5842	Not significant	1.0017	0.02	0.9343	Not significant	-0.0045	0.0026	0.07835	Not significant	0.0085	0.011	0.4392	Not significant
rs1801645	0.0154	0.0087	0.0783	Not significant	-0.0219	0.0136	0.1077	Not significant	0.1163	0.0655	0.07561	Not significant	-0.0058	0.0033	0.07793	Not significant	1.0116	0.0059	0.0497	Not significant	0.9856	0.0206	0.4811	Not significant	0.003	0.0027	0.26	Not significant	0.0074	0.0113	0.5136	Not significant
rs180988137	-0.041	0.0388	0.2908	Not significant	-0.0128	0.0125	0.3041	Not significant	0.2027	0.1925	0.2925	Not significant	-0.0034	0.0032	0.2758	Not significant	1.0079	0.007	0.2594	Not significant	1.1173	0.0869	0.2017	Not significant	-0.0112	0.0118	0.3427	Not significant	0.0208	0.0504	0.679	Not significant
rs184509201	-0.0364	0.0283	0.1993	Not significant	0.0239	0.0211	0.2583	Not significant	0.0633	0.0538	0.2395	Not significant	-0.0036	0.003	0.2398	Not significant	0.9907	0.0076	0.214	Not significant	1.0155	0.0665	0.8175	Not significant	0.0187	0.0086	0.02968	Not significant	0.0302	0.0366	0.4101	Not significant
rs2028150	-0.002	0.0078	0.8003	Not significant	-0.0037	0.0142	0.7962	Not significant	-0.0136	0.0531	0.7983	Not significant	0.0011	0.0035	0.7524	Not significant	1.0015	0.0063	0.8118	Not significant	1.0202	0.0183	0.2744	Not significant	0.0012	0.0024	0.6008	Not significant	0.002	0.0101	0.8465	Not significant
rs2197973	0.0112	0.0077	0.1439	Not significant	0.0194	0.0147	0.1851	Not significant	0.0952	0.0663	0.151	Not significant	-0.0061	0.0043	0.1567	Not significant	1.0118	0.0081	0.1499	Not significant	1.0172	0.018	0.3435	Not significant	-0.0001	0.0023	0.9524	Not significant	-0.0085	0.0099	0.3912	Not significant
rs2237895	-0.0033	0.0077	0.666	Not significant	-0.0076	0.0171	0.6549	Not significant	-0.0248	0.0526	0.6372	Not significant	0.0026	0.0051	0.6092	Not significant	1.0031	0.0065	0.6302	Not significant	1.0306	0.0181	0.09703	Not significant	-0.0019	0.0024	0.4261	Not significant	-0.0066	0.01	0.5084	Not significant
rs2237897	-0.028	0.0194	0.148	Not significant	0.0196	0.0154	0.2023	Not significant	0.0991	0.0703	0.1586	Not significant	-0.0042	0.003	0.1634	Not significant	1.0151	0.0108	0.1629	Not significant	1.0185	0.0457	0.6878	Not significant	-0.0015	0.0059	0.7937	Not significant	0.0118	0.0251	0.64	Not significant
rs2238689	-0.0059	0.0078	0.4487	Not significant	-0.0081	0.0127	0.5245	Not significant	-0.0414	0.0602	0.4921	Not significant	0.0044	0.0057	0.4405	Not significant	1.0048	0.0071	0.4964	Not significant	0.9722	0.0184	0.1252	Not significant	0.0005	0.0024	0.8412	Not significant	0.0038	0.0101	0.709	Not significant
rs2249105	-0.0083	0.008	0.2974	Not significant	-0.0126	0.0125	0.31	Not significant	0.1283	0.1269	0.312	Not significant	-0.0035	0.0033	0.2999	Not significant	1.0063	0.0058	0.2773	Not significant	0.9891	0.0186	0.5555	Not significant	0.0046	0.0024	0.05806	Not significant	-0.0008	0.0103	0.9384	Not significant
rs2258238	0.0111	0.0125	0.3743	Not significant	-0.0153	0.0179	0.3945	Not significant	0.0429	0.0523	0.4127	Not significant	-0.0026	0.003	0.3937	Not significant	0.9954	0.006	0.4385	Not significant	1.0253	0.0291	0.3898	Not significant	0.0009	0.0038	0.8201	Not significant	-0.007	0.0162	0.667	Not significant
rs2283220	0.0111	0.0084	0.1857	Not significant	0.0153	0.0134	0.2546	Not significant	-0.073	0.0595	0.2198	Not significant	-0.0073	0.006	0.223	Not significant	0.9928	0.0057	0.2048	Not significant	0.9903	0.0196	0.6192	Not significant	0.0015	0.0025	0.5621	Not significant	-0.0014	0.0108	0.8947	Not significant
rs2307111	0.007	0.0078	0.3713	Not significant	-0.0125	0.0145	0.3858	Not significant	-0.0441	0.0512	0.389	Not significant	0.0137	0.0153	0.3707	Not significant	1.0051	0.0063	0.4159	Not significant	1.0132	0.0184	0.4762	Not significant	0.0018	0.0024	0.4399	Not significant	-0.0026	0.0102	0.7989	Not significant
rs231361	0.0023	0.0088	0.7934	Not significant	0.0036	0.0132	0.7852	Not significant	0.0158	0.0506	0.7551	Not significant	0.0016	0.0047	0.7275	Not significant	1.0019	0.0075	0.7972	Not significant	1.0185	0.0207	0.3754	Not significant	0.0017	0.0027	0.5236	Not significant	0.0148	0.0114	0.1954	Not significant
rs243024	0.007	0.0077	0.3625	Not significant	-0.0144	0.0164	0.3813	Not significant	-0.046	0.0518	0.3737	Not significant	0.0032	0.0035	0.3667	Not significant	1.0057	0.0069	0.4073	Not significant	1.0255	0.0181	0.1626	Not significant	-0.0006	0.0023	0.7873	Not significant	0.0094	0.01	0.3437	Not significant
rs2456530	-0.004	0.0113	0.725	Not significant	0.0066	0.0166	0.6906	Not significant	0.0237	0.0577	0.6815	Not significant	-0.0014	0.0033	0.666	Not significant	0.9978	0.006	0.7161	Not significant	0.99	0.0267	0.7061	Not significant	-0.0027	0.0034	0.4357	Not significant	-0.0198	0.0147	0.1764	Not significant
rs2642588	0.004	0.0084	0.6333	Not significant	0.0063	0.0129	0.6276	Not significant	0.0243	0.0497	0.6243	Not significant	-0.0029	0.0052	0.5857	Not significant	1.003	0.0061	0.6201	Not significant	1.0191	0.0197	0.3375	Not significant	-0.0012	0.0025	0.6471	Not significant	-0.0082	0.0108	0.4494	Not significant
rs2796441	-0.0135	0.0077	0.08001	Not significant	-0.101	0.0631	0.1097	Not significant	-0.0914	0.0519	0.07827	Not significant	-0.0059	0.0034	0.0828	Not significant	1.0325	0.0167	0.05572	Not significant	1.0117	0.0182	0.5208	Not significant	-0.0037	0.0023	0.1127	Not significant	-0.0122	0.01	0.2234	Not significant
rs2800733	0.0092	0.0084	0.2732	Not significant	0.0145	0.0136	0.2884	Not significant	0.0597	0.0551	0.2784	Not significant	0.0035	0.0031	0.2651	Not significant	0.9934	0.0058	0.2536	Not significant	1.001	0.0198	0.9616	Not significant	0.0017	0.0026	0.4944	Not significant	-0.0119	0.0109	0.2729	Not significant
rs2820446	-0.0062	0.0083	0.4543	Not significant	0.0079	0.0127	0.5354	Not significant	0.0377	0.0551	0.4936	Not significant	0.0023	0.0031	0.4615	Not significant	1.0038	0.0058	0.5134	Not significant	1.0037	0.0196	0.852	Not significant	0.0036	0.0025	0.1509	Not significant	0.0169	0.0108	0.1172	Not significant
rs28505901	0.0008	0.0089	0.9245	Not significant	0.0013	0.0132	0.9244	Not significant	-0.0074	0.1354	0.9563	Not significant	0.0004	0.0032	0.8941	Not significant	1.0005	0.0057	0.9321	Not significant	1.007	0.0209	0.7384	Not significant	0.0027	0.0027	0.3162	Not significant	0.0047	0.0115	0.6823	Not significant
rs2972144	0.0006	0.008	0.9356	Not significant	0.0014	0.0174	0.9352	Not significant	-0.0019	0.0545	0.9727	Not significant	0.0003	0.003	0.9255	Not significant	1.0005	0.0062	0.9381	Not significant	1.0219	0.0189	0.2518	Not significant	-0.0023	0.0024	0.3386	Not significant	-0.0092	0.0104	0.374	Not significant
rs3111316	-0.0005	0.0078	0.9526	Not significant	-0.0009	0.0129	0.9453	Not significant	0.002	0.0708	0.9771	Not significant	-0.0003	0.003	0.9305	Not significant	0.9995	0.0071	0.9451	Not significant	1.0151	0.0182	0.4101	Not significant	-0.0019	0.0024	0.4143	Not significant	0.0195	0.01	0.05155	Not significant
rs3217792	-0.0203	0.014	0.1462	Not significant	-0.0165	0.0128	0.1966	Not significant	-0.1281	0.0905	0.157	Not significant	0.0043	0.0031	0.1602	Not significant	0.9917	0.006	0.1622	Not significant	1.0369	0.0334	0.2777	Not significant	0.0034	0.0042	0.4215	Not significant	0.0011	0.0181	0.952	Not significant
rs3217860	-0.0085	0.0089	0.3381	Not significant	-0.0181	0.0201	0.367	Not significant	0.0478	0.0533	0.369	Not significant	0.0054	0.0058	0.3483	Not significant	1.0065	0.0071	0.3626	Not significant	1.0269	0.0208	0.2009	Not significant	0.0015	0.0027	0.5665	Not significant	0.0012	0.0115	0.9139	Not significant
rs340874	0.0015	0.0077	0.8429	Not significant	0.0031	0.0126	0.8084	Not significant	0.0118	0.057	0.8364	Not significant	0.0009	0.0032	0.7867	Not significant	1.0022	0.0117	0.8494	Not significant	0.9906	0.0181	0.6028	Not significant	-0.0001	0.0023	0.9524	Not significant	0.0079	0.01	0.4313	Not significant
rs34715063	-0.0034	0.0115	0.7678	Not significant	-0.0041	0.0131	0.7562	Not significant	0.0171	0.0511	0.7384	Not significant	-0.0012	0.0032	0.7128	Not significant	1.0019	0.0061	0.7573	Not significant	0.9574	0.0274	0.1116	Not significant	-0.0014	0.0035	0.6859	Not significant	-0.0014	0.0149	0.9254	Not significant
rs348330	0.012	0.008	0.1328	Not significant	-0.0175	0.0126	0.1646	Not significant	-0.0781	0.053	0.1408	Not significant	0.0048	0.0033	0.1475	Not significant	1.0141	0.0092	0.1299	Not significant	1.0153	0.0187	0.4172	Not significant	-0.0036	0.0024	0.1411	Not significant	-0.0001	0.0103	0.9953	Not significant
rs34855406	0.0064	0.0085	0.45	Not significant	-0.0078	0.0125	0.5327	Not significant	0.0396	0.0576	0.4923	Not significant	-0.0024	0.0032	0.4509	Not significant	0.9906	0.0144	0.512	Not significant	0.9879	0.02	0.5432	Not significant	0.0044	0.0026	0.08761	Not significant	-0.0097	0.011	0.3803	Not significant
rs35352848	0.0025	0.0095	0.7953	Not significant	0.0038	0.0143	0.7905	Not significant	-0.0138	0.0506	0.7856	Not significant	-0.0011	0.0033	0.7335	Not significant	0.9985	0.0058	0.8004	Not significant	1.0032	0.0222	0.8842	Not significant	0.001	0.0029	0.7283	Not significant	0.0155	0.0123	0.2052	Not significant
rs35895680	0.0031	0.0082	0.7036	Not significant	-0.0094	0.0216	0.6645	Not significant	-0.0244	0.0542	0.6522	Not significant	0.0015	0.0032	0.6322	Not significant	1.0027	0.0065	0.6814	Not significant	0.9746	0.0192	0.1792	Not significant	0.0007	0.0025	0.7791	Not significant	-0.0032	0.0106	0.7657	Not significant
rs35913461	0.0022	0.0102	0.8303	Not significant	-0.004	0.0163	0.8043	Not significant	0.0107	0.0497	0.8296	Not significant	-0.0009	0.0033	0.7737	Not significant	0.9989	0.0057	0.8452	Not significant	0.9523	0.0236	0.03843	Not significant	0.0006	0.0031	0.8425	Not significant	0.0112	0.0132	0.396	Not significant
rs3768321	-0.0009	0.0096	0.927	Not significant	-0.0011	0.0125	0.93	Not significant	-0.0053	0.1265	0.9668	Not significant	0.0003	0.0031	0.9134	Not significant	0.9993	0.0087	0.9359	Not significant	0.99	0.0227	0.6561	Not significant	-0.0048	0.0029	0.09765	Not significant	0.0058	0.0125	0.6409	Not significant
rs3774723	0.0098	0.0108	0.3661	Not significant	0.0112	0.0128	0.3813	Not significant	-0.044	0.0498	0.3776	Not significant	-0.0028	0.0031	0.3668	Not significant	0.9943	0.007	0.4128	Not significant	0.977	0.0252	0.3561	Not significant	0.0064	0.0033	0.05309	Not significant	-0.0074	0.014	0.5973	Not significant
rs3798519	0.0152	0.01	0.1294	Not significant	0.0223	0.0156	0.1545	Not significant	0.084	0.0543	0.1217	Not significant	-0.0045	0.003	0.14	Not significant	1.0093	0.0057	0.1056	Not significant	0.9797	0.0236	0.3858	Not significant	0.0057	0.003	0.06035	Not significant	-0.0137	0.0129	0.2915	Not significant
rs3802177	-0.0228	0.0083	0.005817	Not significant	-0.0282	0.0134	0.03488	Not significant	0.1331	0.0508	0.008866	Not significant	0.0159	0.0077	0.03749	Not significant	0.9813	0.007	0.007031	Not significant	1.0055	0.0194	0.7795	Not significant	-0.0012	0.0025	0.6393	Not significant	0.0022	0.0107	0.8368	Not significant
rs3810291	-0.003	0.0082	0.712	Not significant	0.0063	0.0149	0.6734	Not significant	-0.0359	0.0812	0.6584	Not significant	0.004	0.0087	0.6408	Not significant	1.003	0.0076	0.695	Not significant	1.0189	0.0193	0.3297	Not significant	0.0009	0.0025	0.7036	Not significant	-0.0218	0.0106	0.03991	Not significant
rs3887925	-0.0026	0.0077	0.7325	Not significant	0.0053	0.0138	0.6998	Not significant	-0.0237	0.0613	0.6994	Not significant	0.0016	0.0037	0.6766	Not significant	0.9978	0.0062	0.7225	Not significant	1.0237	0.0181	0.1955	Not significant	0.0014	0.0023	0.5383	Not significant	0.0064	0.01	0.5196	Not significant
rs41277236	0.0063	0.0195	0.7478	Not significant	-0.0053	0.0141	0.7085	Not significant	0.0226	0.0663	0.7336	Not significant	-0.0013	0.0032	0.6949	Not significant	1.0019	0.0058	0.7411	Not significant	1.1055	0.044	0.02258	Not significant	0.0016	0.0059	0.7829	Not significant	-0.0196	0.0253	0.44	Not significant
rs4238013	-0.002	0.0096	0.8383	Not significant	-0.003	0.0126	0.8082	Not significant	0.0108	0.0505	0.8312	Not significant	-0.0009	0.003	0.7762	Not significant	0.9989	0.0057	0.8473	Not significant	0.9907	0.0226	0.6808	Not significant	0.0031	0.0029	0.2825	Not significant	0.0004	0.0124	0.9773	Not significant
rs429358	0.0051	0.0106	0.6324	Not significant	0.0064	0.0128	0.6142	Not significant	0.027	0.0537	0.615	Not significant	-0.0017	0.003	0.5812	Not significant	1.0033	0.0065	0.6161	Not significant	0.9864	0.0247	0.5784	Not significant	0.0033	0.0032	0.3061	Not significant	-0.001	0.0137	0.9392	Not significant
rs4457053	0.0021	0.0082	0.7942	Not significant	0.0034	0.0128	0.7893	Not significant	0.0203	0.0681	0.7658	Not significant	0.001	0.0031	0.7329	Not significant	0.9966	0.0132	0.7984	Not significant	1.0271	0.0192	0.1633	Not significant	-0.0006	0.0025	0.8083	Not significant	-0.0173	0.0106	0.1027	Not significant
rs465002	-0.0038	0.0088	0.6662	Not significant	0.0064	0.0143	0.656	Not significant	0.023	0.0501	0.6469	Not significant	0.0021	0.004	0.6099	Not significant	0.9957	0.0091	0.636	Not significant	0.9967	0.0206	0.873	Not significant	0.0012	0.0027	0.6473	Not significant	0.0028	0.0114	0.8085	Not significant
rs4686471	0.0013	0.0079	0.8678	Not significant	0.0019	0.0128	0.8789	Not significant	0.0075	0.0577	0.897	Not significant	-0.0007	0.003	0.8287	Not significant	1.0013	0.0091	0.8844	Not significant	0.9988	0.0185	0.9485	Not significant	0.0018	0.0024	0.458	Not significant	-0.0012	0.0102	0.9085	Not significant
rs4688760	-0.0192	0.0083	0.02081	Not significant	-0.0633	0.0319	0.04712	Not significant	0.1301	0.0611	0.03314	Not significant	-0.0077	0.0039	0.05094	Not significant	1.0159	0.0066	0.01656	Not significant	0.9876	0.0194	0.5204	Not significant	0.0005	0.0025	0.8556	Not significant	0.0286	0.0107	0.007737	Not significant
rs4709746	0.0112	0.0113	0.3203	Not significant	0.0119	0.0128	0.3521	Not significant	0.0495	0.0534	0.3545	Not significant	0.0031	0.0032	0.326	Not significant	0.9916	0.0086	0.327	Not significant	0.9684	0.0262	0.2208	Not significant	-0.0056	0.0034	0.1045	Not significant	0.0136	0.0146	0.3532	Not significant
rs4736819	0.0132	0.0077	0.08591	Not significant	-0.0578	0.037	0.1184	Not significant	0.1678	0.098	0.0868	Not significant	-0.005	0.003	0.09669	Not significant	0.9894	0.0057	0.06023	Not significant	1.0115	0.0181	0.5261	Not significant	-0.0006	0.0023	0.8094	Not significant	0.015	0.01	0.1323	Not significant
rs474513	0.0068	0.0077	0.3754	Not significant	-0.0118	0.0145	0.4172	Not significant	0.0414	0.0508	0.4148	Not significant	0.0026	0.0031	0.3959	Not significant	1.0045	0.006	0.4483	Not significant	0.9951	0.018	0.7847	Not significant	-0.0045	0.0023	0.05271	Not significant	-0.0087	0.0099	0.3824	Not significant
rs4804833	-0.0208	0.0079	0.008093	Not significant	-0.0275	0.0135	0.04126	Not significant	-0.1115	0.0497	0.0248	Not significant	-0.006	0.003	0.04769	Not significant	0.9847	0.0059	0.008809	Not significant	1.0106	0.0184	0.5662	Not significant	-0.0011	0.0024	0.6513	Not significant	0.0005	0.0102	0.9583	Not significant
rs4810426	-0.0003	0.0131	0.9838	Not significant	-0.0005	0.0138	0.971	Not significant	-0.0011	0.0611	0.9851	Not significant	0.0002	0.0035	0.9639	Not significant	1.0003	0.0063	0.9663	Not significant	0.939	0.0316	0.0461	Not significant	0.0068	0.004	0.08888	Not significant	-0.0077	0.017	0.6481	Not significant
rs4929965	0.0018	0.0079	0.8158	Not significant	-0.0031	0.0125	0.8039	Not significant	-0.0129	0.0554	0.8153	Not significant	-0.001	0.0033	0.7726	Not significant	1.0027	0.013	0.8351	Not significant	1.0005	0.0185	0.9794	Not significant	-0.0023	0.0024	0.3293	Not significant	-0.0019	0.0102	0.8523	Not significant
rs4932265	-0.0063	0.0087	0.465	Not significant	-0.0137	0.0227	0.5472	Not significant	0.0339	0.0507	0.5035	Not significant	-0.0031	0.0046	0.4995	Not significant	0.9906	0.0147	0.5188	Not significant	0.9752	0.0205	0.2209	Not significant	-0.0018	0.0026	0.4946	Not significant	0.0146	0.0112	0.1944	Not significant
rs4977213	-0.0069	0.0079	0.3852	Not significant	-0.0154	0.0201	0.4431	Not significant	0.0592	0.0744	0.4262	Not significant	0.0035	0.0041	0.401	Not significant	0.9955	0.0061	0.4552	Not significant	1.0046	0.0185	0.804	Not significant	-0.0004	0.0024	0.8704	Not significant	0.0027	0.0102	0.7921	Not significant
rs5213	0.0105	0.0081	0.1947	Not significant	0.0141	0.0125	0.2576	Not significant	0.1865	0.1528	0.2223	Not significant	-0.004	0.0033	0.2258	Not significant	0.9924	0.0061	0.2079	Not significant	1.0178	0.0189	0.3509	Not significant	0.0015	0.0024	0.5478	Not significant	-0.0084	0.0104	0.4223	Not significant
rs523288	-0.0131	0.009	0.1459	Not significant	0.0176	0.0135	0.194	Not significant	0.1662	0.1163	0.1532	Not significant	-0.0057	0.004	0.1579	Not significant	0.9913	0.0062	0.1552	Not significant	1.0262	0.021	0.2196	Not significant	-0.002	0.0027	0.4603	Not significant	-0.0024	0.0117	0.8345	Not significant
rs539515	0.0256	0.0094	0.006558	Not significant	0.03	0.0145	0.03857	Not significant	-0.1204	0.0498	0.01549	Not significant	0.0075	0.0037	0.04336	Not significant	0.9846	0.0058	0.007432	Not significant	1.0136	0.0221	0.5414	Not significant	0.0007	0.0029	0.7938	Not significant	-0.009	0.0122	0.4607	Not significant
rs56337234	0	0.0077	0.9996	Not significant	0.0001	0.0184	0.9969	Not significant	-0.0003	0.068	0.9965	Not significant	0	0.0035	0.9957	Not significant	1	0.0057	0.9992	Not significant	0.9816	0.018	0.3024	Not significant	0.0025	0.0023	0.2742	Not significant	0.0074	0.0099	0.4583	Not significant
rs56348580	-0.0011	0.0083	0.8918	Not significant	-0.0025	0.0178	0.8898	Not significant	0.0058	0.05	0.9077	Not significant	0.0005	0.003	0.8696	Not significant	0.9989	0.0084	0.8986	Not significant	0.9927	0.0195	0.7086	Not significant	-0.0004	0.0025	0.8594	Not significant	0.0106	0.0108	0.3264	Not significant
rs57235767	-0.0048	0.0085	0.572	Not significant	0.0078	0.0145	0.5895	Not significant	-0.0265	0.0508	0.6016	Not significant	0.0018	0.0031	0.5584	Not significant	0.9967	0.0063	0.6004	Not significant	1.0387	0.02	0.05788	Not significant	-0.0001	0.0026	0.9765	Not significant	-0.0082	0.011	0.4532	Not significant
rs58730668	0.0126	0.011	0.2515	Not significant	-0.0141	0.0127	0.269	Not significant	-0.0798	0.0715	0.2643	Not significant	0.0039	0.0034	0.2558	Not significant	0.9931	0.006	0.2451	Not significant	1.0271	0.0261	0.3046	Not significant	0.0042	0.0033	0.2115	Not significant	-0.0041	0.0143	0.7764	Not significant
rs601945	0.0029	0.0097	0.7683	Not significant	-0.0037	0.0125	0.7639	Not significant	-0.024	0.0734	0.7435	Not significant	-0.0014	0.0038	0.7144	Not significant	1.0028	0.0096	0.7699	Not significant	1.0158	0.0227	0.491	Not significant	0.0058	0.0029	0.04955	Not significant	0.0088	0.0126	0.4849	Not significant
rs6070625	-0.0007	0.0077	0.9265	Not significant	0.0034	0.0384	0.9298	Not significant	-0.0027	0.0544	0.9611	Not significant	-0.0004	0.0031	0.904	Not significant	1.0005	0.0059	0.9346	Not significant	0.9557	0.018	0.01184	Not significant	-0.0005	0.0023	0.8404	Not significant	-0.0123	0.0099	0.2149	Not significant
rs62107261	-0.029	0.0179	0.1062	Not significant	0.035	0.0237	0.1409	Not significant	-0.0827	0.0501	0.09893	Not significant	0.0051	0.0033	0.119	Not significant	0.9884	0.0067	0.08125	Not significant	0.9772	0.0418	0.5816	Not significant	0.0033	0.0054	0.544	Not significant	-0.0071	0.0232	0.7611	Not significant
rs62492368	-0.0005	0.0084	0.9531	Not significant	-0.0013	0.0214	0.9525	Not significant	0.0012	0.0499	0.9804	Not significant	-0.0004	0.0055	0.9472	Not significant	1.0004	0.0058	0.95	Not significant	1.0298	0.0196	0.1337	Not significant	0.0034	0.0025	0.1831	Not significant	0.0048	0.0108	0.6592	Not significant
rs6458354	0.0065	0.0084	0.4358	Not significant	0.0083	0.0125	0.5099	Not significant	0.039	0.0543	0.4718	Not significant	0.0029	0.0037	0.4313	Not significant	0.9956	0.0062	0.477	Not significant	1.0037	0.0197	0.8505	Not significant	0.0024	0.0026	0.3542	Not significant	0.0115	0.0109	0.2923	Not significant
rs6459733	-0.0002	0.0081	0.9787	Not significant	0.0012	0.0286	0.9671	Not significant	0.0018	0.0935	0.9848	Not significant	-0.0002	0.0034	0.9637	Not significant	0.9994	0.0111	0.9604	Not significant	0.9965	0.0191	0.8541	Not significant	0.0051	0.0025	0.03734	Not significant	0.0062	0.0105	0.5573	Not significant
rs6518681	-0.0185	0.0133	0.1634	Not significant	0.0428	0.034	0.2083	Not significant	-0.1235	0.0946	0.1916	Not significant	0.0043	0.0032	0.1693	Not significant	0.9863	0.0103	0.1815	Not significant	1.0271	0.0315	0.3958	Not significant	-0.0024	0.004	0.5462	Not significant	0.0208	0.0172	0.2256	Not significant
rs6600191	-0.0007	0.01	0.9429	Not significant	-0.0009	0.0125	0.944	Not significant	-0.0016	0.0497	0.9736	Not significant	0.0003	0.0038	0.9289	Not significant	0.9992	0.0103	0.9402	Not significant	1.0008	0.0234	0.9715	Not significant	-0.0026	0.003	0.3823	Not significant	-0.0098	0.0129	0.4466	Not significant
rs67232546	-0.0026	0.0094	0.7862	Not significant	-0.0036	0.0127	0.7737	Not significant	-0.0161	0.0505	0.7503	Not significant	0.0011	0.0032	0.721	Not significant	1.0019	0.0066	0.7772	Not significant	0.972	0.0223	0.2016	Not significant	0.0083	0.0029	0.003722	Not significant	-0.0152	0.0122	0.2111	Not significant
rs6780171	0.0253	0.0083	0.002197	Not significant	0.061	0.019	0.00128	Significant	0.1564	0.0562	0.00542	Not significant	-0.0083	0.003	0.00638	Not significant	0.9597	0.015	0.006193	Not significant	0.9926	0.0194	0.7016	Not significant	-0.0031	0.0025	0.2107	Not significant	0.0088	0.0107	0.4092	Not significant
rs6885132	-0.0001	0.013	0.9916	Not significant	0.0002	0.0166	0.9917	Not significant	0.0009	0.0499	0.9863	Not significant	0.0001	0.0038	0.9795	Not significant	1.0002	0.0059	0.9713	Not significant	0.992	0.0304	0.7928	Not significant	0.0039	0.0039	0.3235	Not significant	-0.0047	0.0168	0.7805	Not significant
rs7022807	0.0078	0.0078	0.3194	Not significant	0.0434	0.0461	0.3463	Not significant	-0.051	0.0541	0.3459	Not significant	0.0039	0.0039	0.3219	Not significant	0.9932	0.0069	0.3239	Not significant	1.0121	0.0184	0.5138	Not significant	-0.0019	0.0024	0.4238	Not significant	-0.0013	0.0101	0.8963	Not significant
rs702634	-0.0067	0.0083	0.4192	Not significant	0.0092	0.0138	0.5054	Not significant	0.0358	0.0497	0.4717	Not significant	0.0028	0.0035	0.4308	Not significant	0.9956	0.0061	0.4717	Not significant	1.0026	0.0195	0.894	Not significant	-0.0002	0.0025	0.9406	Not significant	-0.0104	0.0108	0.3343	Not significant
rs703972	0.0054	0.0077	0.4828	Not significant	0.008	0.0135	0.5542	Not significant	0.0325	0.0528	0.538	Not significant	-0.0024	0.0036	0.5067	Not significant	0.9964	0.0058	0.5371	Not significant	0.9979	0.018	0.9061	Not significant	-0.0044	0.0023	0.05742	Not significant	0.0034	0.0099	0.7287	Not significant
rs7078559	0.0014	0.0078	0.8524	Not significant	-0.0024	0.0134	0.856	Not significant	0.0097	0.0546	0.8596	Not significant	-0.0008	0.0033	0.8043	Not significant	1.0013	0.0075	0.8602	Not significant	0.9797	0.0182	0.2597	Not significant	0.0042	0.0024	0.0724	Not significant	0.0205	0.0101	0.04168	Not significant
rs7178762	-0.0021	0.0077	0.7878	Not significant	0.0034	0.0125	0.7826	Not significant	-0.0179	0.0571	0.7538	Not significant	0.0015	0.0044	0.7228	Not significant	1.0016	0.0062	0.7964	Not significant	0.9816	0.0181	0.3046	Not significant	0.0018	0.0023	0.4398	Not significant	0.0015	0.01	0.8841	Not significant
rs718314	-0.0123	0.0089	0.1676	Not significant	-0.0158	0.0126	0.2086	Not significant	0.0652	0.051	0.2009	Not significant	-0.0105	0.0077	0.1737	Not significant	0.9859	0.0107	0.1834	Not significant	0.9995	0.021	0.9809	Not significant	0.0043	0.0027	0.1115	Not significant	0.0264	0.0116	0.02252	Not significant
rs72802342	0.0271	0.0146	0.06284	Not significant	0.0262	0.0153	0.08742	Not significant	-0.1303	0.0733	0.07534	Not significant	-0.0057	0.0032	0.07745	Not significant	0.9704	0.0143	0.03573	Not significant	0.9884	0.0341	0.7327	Not significant	-0.0015	0.0044	0.7337	Not significant	0.0246	0.0189	0.192	Not significant
rs72926932	0.0088	0.0139	0.527	Not significant	0.007	0.0126	0.5814	Not significant	-0.0349	0.0656	0.5948	Not significant	-0.0054	0.009	0.548	Not significant	1.0031	0.0057	0.5874	Not significant	0.9966	0.0327	0.9176	Not significant	0.0023	0.0042	0.5834	Not significant	0.0307	0.018	0.08843	Not significant
rs738408	0.0018	0.0093	0.8487	Not significant	0.005	0.0206	0.8103	Not significant	0.0091	0.0508	0.8584	Not significant	-0.0014	0.0055	0.7927	Not significant	1.001	0.0057	0.8596	Not significant	0.9896	0.0218	0.632	Not significant	0.0022	0.0028	0.4379	Not significant	0.0113	0.012	0.3482	Not significant
rs74653713	-0.0259	0.0205	0.2063	Not significant	0.0144	0.0128	0.2599	Not significant	-0.0581	0.0496	0.2411	Not significant	0.0039	0.0034	0.2416	Not significant	0.9919	0.0066	0.2177	Not significant	1.0719	0.0501	0.1659	Not significant	-0.0062	0.0062	0.3233	Not significant	-0.0273	0.0266	0.305	Not significant
rs76011118	-0.003	0.0236	0.9004	Not significant	-0.0018	0.0135	0.8938	Not significant	-0.0042	0.0502	0.9329	Not significant	0.0004	0.0031	0.8848	Not significant	0.9993	0.0058	0.9089	Not significant	1.0573	0.0541	0.3025	Not significant	0.004	0.0072	0.5751	Not significant	0.0157	0.0305	0.606	Not significant
rs7669833	-0.0069	0.0085	0.4141	Not significant	-0.0143	0.0204	0.4816	Not significant	0.0396	0.0546	0.4685	Not significant	0.0026	0.0032	0.4222	Not significant	0.9959	0.0057	0.4685	Not significant	0.992	0.0199	0.6852	Not significant	0.0003	0.0026	0.9153	Not significant	0.0145	0.011	0.1881	Not significant
rs76895963	-0.0607	0.0297	0.04089	Not significant	-0.0247	0.0135	0.06787	Not significant	0.1216	0.0648	0.06067	Not significant	-0.008	0.0045	0.07261	Not significant	0.988	0.0057	0.03454	Not significant	1.1215	0.0734	0.1181	Not significant	0.0045	0.009	0.6143	Not significant	-0.0122	0.0384	0.7498	Not significant
rs77464186	-0.0027	0.0105	0.7976	Not significant	-0.0035	0.0137	0.7961	Not significant	-0.0134	0.0502	0.7897	Not significant	-0.0012	0.0035	0.7349	Not significant	0.9981	0.0079	0.8066	Not significant	0.9657	0.0244	0.1515	Not significant	0.0065	0.0032	0.04029	Not significant	-0.0138	0.0136	0.3111	Not significant
rs7756992	-0.0063	0.0087	0.4705	Not significant	0.0078	0.0131	0.5501	Not significant	0.0316	0.05	0.5271	Not significant	-0.0023	0.0035	0.5027	Not significant	1.0041	0.0065	0.5275	Not significant	1.0104	0.0203	0.6095	Not significant	0.0003	0.0026	0.8944	Not significant	-0.0015	0.0112	0.8969	Not significant
rs78025551	-0.0005	0.0109	0.965	Not significant	0.002	0.0396	0.9604	Not significant	0.001	0.05	0.9833	Not significant	0.0002	0.0031	0.9554	Not significant	1.0003	0.0061	0.9563	Not significant	1.0089	0.0257	0.7311	Not significant	-0.0036	0.0033	0.2804	Not significant	-0.0019	0.0141	0.8929	Not significant
rs7903146	0.0009	0.0084	0.9117	Not significant	-0.0016	0.0137	0.9067	Not significant	0.0043	0.0767	0.9553	Not significant	-0.0011	0.0082	0.8915	Not significant	0.9994	0.006	0.914	Not significant	1.0087	0.0197	0.6593	Not significant	-0.0016	0.0026	0.5331	Not significant	0.0198	0.0109	0.06951	Not significant
rs79687284	-0.018	0.0209	0.3871	Not significant	0.0136	0.0179	0.448	Not significant	0.0463	0.0585	0.4286	Not significant	-0.0077	0.0093	0.4055	Not significant	1.0044	0.0059	0.4633	Not significant	0.9909	0.0492	0.8527	Not significant	0.0084	0.0063	0.1838	Not significant	0.0221	0.027	0.4124	Not significant
rs80147536	-0.0174	0.0127	0.1691	Not significant	-0.0163	0.013	0.2125	Not significant	0.0697	0.0548	0.2037	Not significant	0.011	0.0081	0.1767	Not significant	1.0082	0.0061	0.1844	Not significant	1.0181	0.0299	0.5478	Not significant	0.0065	0.0038	0.09255	Not significant	0.016	0.0164	0.3291	Not significant
rs8037894	-0.0069	0.0077	0.3756	Not significant	0.0099	0.0125	0.4293	Not significant	0.0451	0.0555	0.4165	Not significant	0.003	0.0036	0.3988	Not significant	1.0043	0.0057	0.453	Not significant	1.0158	0.0182	0.389	Not significant	0	0.0023	0.9932	Not significant	0.0035	0.01	0.7256	Not significant
rs8107974	-0.0132	0.0144	0.3609	Not significant	0.0113	0.0128	0.3784	Not significant	0.048	0.0539	0.3731	Not significant	0.0046	0.005	0.3624	Not significant	0.9759	0.0288	0.3973	Not significant	1.0002	0.0338	0.9963	Not significant	0.0073	0.0044	0.0958	Not significant	-0.0037	0.0187	0.8414	Not significant
rs862320	0.0106	0.0078	0.1743	Not significant	-0.0153	0.0126	0.2263	Not significant	-0.0733	0.0579	0.2059	Not significant	0.0059	0.0045	0.1919	Not significant	0.9897	0.0081	0.2007	Not significant	1.0167	0.0183	0.3674	Not significant	-0.0031	0.0024	0.191	Not significant	-0.0139	0.0101	0.167	Not significant
rs878521	0.0147	0.0088	0.09645	Not significant	0.019	0.0126	0.1309	Not significant	-0.086	0.0505	0.08888	Not significant	-0.0071	0.0043	0.1002	Not significant	0.9898	0.0057	0.06992	Not significant	0.9921	0.0208	0.7037	Not significant	0.0017	0.0027	0.5185	Not significant	0.0099	0.0114	0.3855	Not significant
rs9379084	0.0046	0.0123	0.7064	Not significant	0.0059	0.0136	0.6678	Not significant	0.0237	0.0533	0.6571	Not significant	-0.0014	0.003	0.6353	Not significant	1.0085	0.021	0.6871	Not significant	0.9991	0.0289	0.9764	Not significant	-0.0017	0.0037	0.6502	Not significant	-0.0266	0.016	0.09581	Not significant
rs9563615	0.0073	0.0084	0.382	Not significant	-0.0119	0.0153	0.4392	Not significant	0.0437	0.0546	0.4236	Not significant	-0.0042	0.0049	0.4009	Not significant	1.0047	0.0063	0.4545	Not significant	1.0006	0.0197	0.9738	Not significant	-0.0022	0.0025	0.3873	Not significant	-0.0069	0.0109	0.5256	Not significant
rs9569864	0.0001	0.0102	0.9916	Not significant	-0.0001	0.0125	0.9929	Not significant	-0.001	0.0624	0.9873	Not significant	0	0.0033	0.9906	Not significant	1.0001	0.0057	0.9866	Not significant	1.0054	0.0238	0.821	Not significant	-0.0014	0.0031	0.6588	Not significant	-0.0034	0.0131	0.7951	Not significant
rs9687832	-0.0095	0.0095	0.3157	Not significant	0.0125	0.0126	0.3233	Not significant	0.0498	0.0499	0.3179	Not significant	0.0031	0.0031	0.3113	Not significant	1.0066	0.0062	0.2905	Not significant	1.0233	0.022	0.2949	Not significant	0.0006	0.0029	0.8415	Not significant	0.0064	0.0122	0.6028	Not significant
rs9860730	0.0038	0.0085	0.653	Not significant	-0.0105	0.0235	0.6532	Not significant	-0.0607	0.1286	0.637	Not significant	0.0017	0.0031	0.5926	Not significant	0.9964	0.0074	0.6271	Not significant	0.9681	0.0197	0.1005	Not significant	0.0014	0.0026	0.5767	Not significant	-0.0125	0.0109	0.2542	Not significant
rs9873618	-0.003	0.0084	0.7221	Not significant	-0.0064	0.0157	0.683	Not significant	-0.022	0.0503	0.6616	Not significant	-0.0015	0.0032	0.6505	Not significant	1.0025	0.0068	0.7134	Not significant	0.962	0.0197	0.04895	Not significant	0.0002	0.0026	0.9468	Not significant	-0.0087	0.0109	0.4284	Not significant
Note. BMI= body mass index, SBP= systolic blood pressure, OR= odds ratio, BH-significance=Benjamini-Hochberg false discovery rate of 0.25.

## Sheet: HbA1c_SNPs_confounders
ESM Table 4 - Associations between 52 HbA1c SNPs and confounders
	Deprivation				BMI				SBP				Total cholesterol				Smoking				Stroke				Triglycerides				CRP
SNP	Beta	SE	P-value	BH-significance	Beta	SE	P-value	BH-significance	Beta	SE	P-value	BH-significance	Beta	SE	P-value	BH-significance	OR	SE	P-value	BH-significance	OR	SE	P-value	BH-significance	Beta	SE	P-value	BH-significance	Beta	SE	P-value	BH-significance
rs1046896	0.002	0.0083	0.8123	Not significant	0.0029	0.015	0.8456	Not significant	-0.0151	0.0567	0.7904	Not significant	-0.0006	0.0031	0.833	Not significant	1.0032	0.0086	0.7123	Not significant	1.0274	0.0193	0.1612	Not significant	0.0044	0.0025	0.07933	Not significant	0.0044	0.0107	0.6796	Not significant
rs10774625	0.0013	0.0077	0.8604	Not significant	-0.002	0.0166	0.902	Not significant	0.0118	0.06	0.8442	Not significant	-0.0009	0.0079	0.9087	Not significant	0.9982	0.0059	0.7616	Not significant	0.9895	0.018	0.558	Not significant	0.0013	0.0023	0.5654	Not significant	0.0001	0.0099	0.9909	Not significant
rs10823343	0.0013	0.0088	0.8823	Not significant	0.0013	0.0128	0.9175	Not significant	0.0075	0.0514	0.8835	Not significant	0.0002	0.003	0.944	Not significant	0.9992	0.0057	0.8877	Not significant	1.0117	0.0207	0.5762	Not significant	0.0011	0.0027	0.6814	Not significant	0.0096	0.0114	0.3997	Not significant
rs10830963	0.014	0.0086	0.1023	Not significant	0.0187	0.0172	0.2765	Not significant	0.0926	0.0544	0.08843	Not significant	0.0059	0.004	0.1435	Not significant	0.9908	0.0068	0.1772	Not significant	1.0015	0.0201	0.9388	Not significant	-0.0013	0.0026	0.6273	Not significant	0.0074	0.0111	0.5066	Not significant
rs11086054	-0.0097	0.0084	0.2491	Not significant	0.0091	0.0126	0.4734	Not significant	0.0539	0.0518	0.2985	Not significant	0.0033	0.0031	0.286	Not significant	1.0058	0.0062	0.35	Not significant	0.9916	0.0196	0.666	Not significant	0.0008	0.0025	0.7665	Not significant	0.0063	0.0109	0.5607	Not significant
rs11224302	0.0021	0.0129	0.8709	Not significant	-0.0018	0.0149	0.9047	Not significant	0.0117	0.0649	0.8569	Not significant	0.0003	0.0031	0.9104	Not significant	0.9983	0.0065	0.796	Not significant	1.0082	0.0304	0.7875	Not significant	0.001	0.0039	0.7981	Not significant	-0.029	0.0167	0.08302	Not significant
rs11248914	0.0016	0.0081	0.844	Not significant	0.0029	0.0155	0.8534	Not significant	0.0126	0.0526	0.8106	Not significant	0.0007	0.0036	0.8438	Not significant	1.0022	0.006	0.7154	Not significant	1.0394	0.0192	0.04421	Not significant	-0.0016	0.0025	0.5288	Not significant	-0.0085	0.0105	0.4197	Not significant
rs11558471	-0.02	0.0082	0.01478	Not significant	-0.0226	0.0134	0.09105	Not significant	0.1294	0.0648	0.04595	Not significant	0.0096	0.0042	0.02138	Not significant	0.9828	0.008	0.0308	Not significant	1.0048	0.0193	0.8025	Not significant	-0.0011	0.0025	0.6514	Not significant	0.0026	0.0106	0.8035	Not significant
rs11603334	-0.0037	0.0105	0.7242	Not significant	-0.0049	0.0154	0.7503	Not significant	0.0246	0.0576	0.6698	Not significant	-0.0017	0.0038	0.6504	Not significant	0.9967	0.006	0.5854	Not significant	0.9718	0.0245	0.2432	Not significant	0.0065	0.0032	0.04105	Not significant	-0.017	0.0136	0.2122	Not significant
rs11619319	0.0117	0.0092	0.2072	Not significant	0.0123	0.0144	0.3919	Not significant	-0.101	0.0925	0.2753	Not significant	0.0042	0.0037	0.2547	Not significant	0.9926	0.007	0.2863	Not significant	1.0476	0.0214	0.03006	Not significant	0.003	0.0028	0.2838	Not significant	-0.0152	0.012	0.2033	Not significant
rs11708067	0.0016	0.0089	0.8553	Not significant	-0.0024	0.0145	0.8706	Not significant	0.0102	0.0496	0.8374	Not significant	-0.0009	0.0056	0.8698	Not significant	1.0023	0.0066	0.7249	Not significant	1.0147	0.021	0.4848	Not significant	0.0016	0.0027	0.565	Not significant	-0.0142	0.0115	0.2171	Not significant
rs11964178	0.0036	0.0077	0.64	Not significant	-0.0053	0.0134	0.6917	Not significant	0.0344	0.0703	0.625	Not significant	0.0025	0.0051	0.6194	Not significant	1.0041	0.0066	0.5305	Not significant	0.9956	0.0182	0.8078	Not significant	0.0016	0.0023	0.4913	Not significant	0.0189	0.01	0.05839	Not significant
rs12621844	-0.0006	0.0079	0.9425	Not significant	0.0008	0.0129	0.9489	Not significant	0.0065	0.0511	0.8988	Not significant	-0.0002	0.0034	0.9637	Not significant	1.0007	0.0068	0.9153	Not significant	1.0072	0.0185	0.6994	Not significant	0.002	0.0024	0.4049	Not significant	-0.0115	0.0102	0.2614	Not significant
rs13134327	0.0121	0.0082	0.1397	Not significant	0.0119	0.0125	0.3409	Not significant	-0.0826	0.0615	0.1793	Not significant	-0.0057	0.004	0.1491	Not significant	1.0162	0.0122	0.1881	Not significant	0.9782	0.0194	0.2559	Not significant	0.0011	0.0025	0.6658	Not significant	0.0045	0.0106	0.6694	Not significant
rs1467311	-0.0085	0.0081	0.2937	Not significant	-0.0112	0.0172	0.5136	Not significant	0.0451	0.0555	0.4165	Not significant	0.0033	0.0041	0.4244	Not significant	1.0051	0.0061	0.4021	Not significant	0.9643	0.0192	0.05789	Not significant	-0.0006	0.0025	0.7974	Not significant	0.0051	0.0105	0.6275	Not significant
rs1558902	-0.0106	0.0078	0.1738	Not significant	0.0118	0.0134	0.3777	Not significant	0.0593	0.0536	0.2682	Not significant	0.004	0.0035	0.2496	Not significant	1.0063	0.0057	0.2744	Not significant	0.9828	0.0183	0.343	Not significant	-0.0012	0.0024	0.6122	Not significant	0.004	0.0101	0.6933	Not significant
rs174577	-0.0093	0.008	0.2471	Not significant	0.0176	0.0237	0.4575	Not significant	0.0707	0.066	0.2836	Not significant	-0.0034	0.003	0.2632	Not significant	1.0061	0.0064	0.3426	Not significant	1.0229	0.0188	0.2298	Not significant	-0.0005	0.0024	0.8457	Not significant	0.0011	0.0104	0.9165	Not significant
rs17509001	-0.0101	0.0108	0.3508	Not significant	0.0081	0.0125	0.5165	Not significant	0.0661	0.0837	0.4297	Not significant	0.0026	0.0035	0.4584	Not significant	0.9949	0.0061	0.4024	Not significant	1.0478	0.0251	0.06253	Not significant	0.0015	0.0033	0.6506	Not significant	-0.0154	0.014	0.2733	Not significant
rs17533903	0.0006	0.0095	0.9522	Not significant	-0.0014	0.0232	0.9519	Not significant	-0.008	0.0668	0.9044	Not significant	-0.0001	0.0037	0.9774	Not significant	0.9993	0.0076	0.9238	Not significant	1.0066	0.0223	0.7669	Not significant	0.0001	0.0029	0.9797	Not significant	-0.0012	0.0123	0.9237	Not significant
rs17747324	0.0076	0.0092	0.4054	Not significant	0.008	0.0125	0.5204	Not significant	-0.0469	0.061	0.4415	Not significant	0.0038	0.0053	0.4707	Not significant	1.0047	0.0057	0.416	Not significant	1.0198	0.0214	0.3584	Not significant	-0.0023	0.0028	0.4168	Not significant	0.0121	0.0119	0.3094	Not significant
rs1800562	-0.0044	0.0143	0.7591	Not significant	-0.0085	0.0326	0.7932	Not significant	-0.0245	0.0684	0.7207	Not significant	0.0009	0.003	0.7534	Not significant	0.9952	0.01	0.6269	Not significant	1.0061	0.0335	0.8559	Not significant	-0.005	0.0043	0.2508	Not significant	0.0169	0.0185	0.3588	Not significant
rs198846	0.0079	0.0105	0.4557	Not significant	-0.0076	0.0127	0.5513	Not significant	-0.0373	0.0499	0.4542	Not significant	-0.0021	0.0032	0.5078	Not significant	1.0047	0.0063	0.4545	Not significant	1.0115	0.0249	0.646	Not significant	0.0063	0.0032	0.04967	Not significant	-0.0034	0.0137	0.8041	Not significant
rs2110073	-0.0025	0.0135	0.8555	Not significant	0.002	0.0132	0.8826	Not significant	-0.0258	0.1298	0.8428	Not significant	-0.0006	0.0046	0.9002	Not significant	1.002	0.0062	0.7453	Not significant	0.9824	0.0318	0.5761	Not significant	-0.0013	0.0041	0.7529	Not significant	0.0061	0.0174	0.7278	Not significant
rs2191349	-0.0023	0.0077	0.7689	Not significant	0.0067	0.0269	0.8024	Not significant	0.0167	0.0508	0.7425	Not significant	0.0008	0.0033	0.8094	Not significant	0.997	0.0063	0.6358	Not significant	1.016	0.0181	0.3792	Not significant	-0.0023	0.0023	0.3331	Not significant	0	0.01	0.9976	Not significant
rs2375278	-0.0038	0.0103	0.7121	Not significant	-0.0053	0.0141	0.7085	Not significant	-0.0239	0.0499	0.6324	Not significant	-0.0015	0.003	0.6272	Not significant	0.9942	0.0095	0.5403	Not significant	0.9589	0.0245	0.08696	Not significant	-0.0065	0.0031	0.03677	Not significant	-0.0257	0.0133	0.05404	Not significant
rs2383208	-0.0246	0.01	0.0138	Not significant	0.0267	0.0128	0.0361	Not significant	0.1214	0.0584	0.03768	Not significant	0.0133	0.0058	0.02118	Not significant	1.0128	0.0057	0.02495	Not significant	1.0065	0.0235	0.7812	Not significant	-0.0022	0.003	0.4625	Not significant	0.0058	0.0129	0.6546	Not significant
rs2408955	0.0115	0.0077	0.1323	Not significant	-0.013	0.0126	0.3006	Not significant	0.0926	0.0572	0.1054	Not significant	-0.0044	0.003	0.1458	Not significant	0.986	0.0105	0.1788	Not significant	0.9964	0.018	0.8423	Not significant	0.0018	0.0023	0.4327	Not significant	0.0096	0.0099	0.3335	Not significant
rs267738	-0.0126	0.0092	0.1728	Not significant	-0.0186	0.021	0.3749	Not significant	0.0651	0.0562	0.2466	Not significant	0.0042	0.0036	0.2476	Not significant	1.0072	0.0058	0.2156	Not significant	0.9714	0.0215	0.1775	Not significant	-0.0024	0.0028	0.3999	Not significant	-0.0053	0.0119	0.6603	Not significant
rs282587	-0.0018	0.0117	0.8742	Not significant	-0.0016	0.0139	0.9061	Not significant	0.0085	0.0541	0.8744	Not significant	0.0003	0.0037	0.9355	Not significant	1.0008	0.0057	0.8829	Not significant	0.9391	0.028	0.0247	Not significant	-0.0022	0.0035	0.5334	Not significant	0.0289	0.0151	0.05527	Not significant
rs3782123	0.0043	0.0087	0.6177	Not significant	0.0079	0.0163	0.6297	Not significant	-0.0292	0.0564	0.6041	Not significant	-0.0017	0.0033	0.6006	Not significant	1.0037	0.0057	0.5185	Not significant	1.0193	0.0203	0.3454	Not significant	-0.004	0.0026	0.1291	Not significant	-0.01	0.0113	0.3737	Not significant
rs3824065	-0.001	0.0077	0.896	Not significant	0.001	0.0136	0.9413	Not significant	0.0075	0.0577	0.897	Not significant	-0.0002	0.0036	0.9502	Not significant	0.9992	0.0068	0.9035	Not significant	0.9769	0.0181	0.197	Not significant	-0.0009	0.0023	0.6994	Not significant	0.0042	0.01	0.6721	Not significant
rs4607517	0.0194	0.01	0.05268	Not significant	-0.0182	0.0163	0.2637	Not significant	0.1122	0.0616	0.06868	Not significant	-0.0066	0.0039	0.09679	Not significant	1.0089	0.0057	0.1185	Not significant	0.9925	0.0235	0.7495	Not significant	-0.0003	0.003	0.9092	Not significant	-0.0006	0.013	0.9616	Not significant
rs4737009	0.0045	0.009	0.6179	Not significant	-0.0069	0.0151	0.6462	Not significant	-0.0271	0.0547	0.6201	Not significant	-0.0016	0.0031	0.6058	Not significant	1.0047	0.0074	0.5246	Not significant	0.9853	0.0212	0.4845	Not significant	-0.0002	0.0027	0.9297	Not significant	0.0027	0.0117	0.8162	Not significant
rs4745982	-0.0289	0.0146	0.04749	Not significant	-0.0235	0.0168	0.1611	Not significant	-0.0999	0.0503	0.04717	Not significant	0.0074	0.0033	0.02294	Not significant	0.989	0.0064	0.08469	Not significant	0.9498	0.0335	0.1241	Not significant	0	0.0044	0.9995	Not significant	0	0.0189	0.9995	Not significant
rs4783565	0.0169	0.0086	0.04857	Not significant	0.018	0.0153	0.24	Not significant	0.0921	0.0497	0.06371	Not significant	0.0073	0.0035	0.03608	Not significant	1.0132	0.0078	0.09317	Not significant	1.0041	0.0201	0.8405	Not significant	0.002	0.0026	0.4409	Not significant	0.0097	0.0111	0.3808	Not significant
rs4820268	0.0066	0.0077	0.3895	Not significant	-0.009	0.0139	0.5197	Not significant	0.0414	0.0533	0.4371	Not significant	0.0025	0.0035	0.4646	Not significant	0.9936	0.0078	0.4071	Not significant	1.0102	0.018	0.572	Not significant	-0.0003	0.0023	0.8924	Not significant	0.0118	0.0099	0.2355	Not significant
rs4894799	-0.0146	0.0079	0.06506	Not significant	-0.0161	0.0147	0.2713	Not significant	-0.0868	0.0505	0.08575	Not significant	-0.0055	0.0034	0.1061	Not significant	0.9905	0.0065	0.1412	Not significant	1.0382	0.0187	0.04468	Not significant	0.0023	0.0024	0.3394	Not significant	-0.006	0.0103	0.5609	Not significant
rs560887	0.0046	0.0083	0.5816	Not significant	0.0061	0.0125	0.6237	Not significant	-0.0423	0.0598	0.4795	Not significant	0.0019	0.0032	0.5441	Not significant	0.9924	0.0107	0.4795	Not significant	0.999	0.0196	0.9593	Not significant	-0.0001	0.0025	0.9728	Not significant	-0.0074	0.0108	0.4945	Not significant
rs579459	0.0026	0.0094	0.7782	Not significant	0.0034	0.0141	0.8115	Not significant	0.0284	0.0945	0.764	Not significant	0.0016	0.0065	0.8097	Not significant	0.9976	0.0057	0.6715	Not significant	0.9653	0.0223	0.1139	Not significant	0.0014	0.0029	0.6232	Not significant	-0.007	0.0122	0.5686	Not significant
rs592423	-0.0018	0.0077	0.8099	Not significant	0.0034	0.0142	0.8137	Not significant	-0.0173	0.0594	0.7705	Not significant	-0.001	0.0043	0.8178	Not significant	1.0023	0.0058	0.6919	Not significant	1.0097	0.018	0.5922	Not significant	0.0005	0.0023	0.8226	Not significant	0.0062	0.01	0.5309	Not significant
rs6474359	-0.0147	0.02	0.4632	Not significant	0.0072	0.013	0.5799	Not significant	0.0788	0.1073	0.463	Not significant	-0.002	0.003	0.5159	Not significant	0.9891	0.0148	0.4568	Not significant	1.029	0.0478	0.5502	Not significant	-0.0012	0.0061	0.8399	Not significant	0.0235	0.0259	0.3648	Not significant
rs6980507	0.0108	0.0078	0.1665	Not significant	-0.0134	0.0145	0.3532	Not significant	-0.0631	0.0499	0.2058	Not significant	0.0036	0.0031	0.2421	Not significant	0.9911	0.007	0.2008	Not significant	0.9836	0.0184	0.371	Not significant	0.0034	0.0024	0.1485	Not significant	-0.0061	0.0101	0.5485	Not significant
rs7040409	-0.0131	0.0166	0.429	Not significant	0.008	0.0126	0.5272	Not significant	0.0403	0.0528	0.4456	Not significant	0.0022	0.0032	0.4953	Not significant	0.9943	0.0075	0.4471	Not significant	0.9561	0.0383	0.2416	Not significant	-0.0013	0.005	0.7901	Not significant	0.0105	0.0215	0.6261	Not significant
rs7616006	0.0082	0.0078	0.2895	Not significant	-0.0096	0.0137	0.4865	Not significant	0.0787	0.0873	0.3675	Not significant	-0.0029	0.0032	0.3627	Not significant	0.9943	0.0067	0.3886	Not significant	1.0066	0.0182	0.7191	Not significant	0.002	0.0024	0.4043	Not significant	0.014	0.01	0.1624	Not significant
rs7756992	-0.0063	0.0087	0.4705	Not significant	0.0066	0.0125	0.5957	Not significant	-0.036	0.0502	0.4737	Not significant	-0.002	0.0031	0.5299	Not significant	0.995	0.007	0.4734	Not significant	1.0104	0.0203	0.6095	Not significant	0.0003	0.0026	0.8944	Not significant	-0.0015	0.0112	0.8969	Not significant
rs8192675	-0.004	0.0084	0.6378	Not significant	-0.0062	0.0137	0.6521	Not significant	0.0263	0.0533	0.6215	Not significant	-0.0016	0.0032	0.6188	Not significant	0.9964	0.0057	0.5251	Not significant	0.9615	0.0197	0.04591	Not significant	-0.0003	0.0026	0.8921	Not significant	-0.0116	0.0109	0.2884	Not significant
rs837763	0.0094	0.0077	0.2222	Not significant	-0.0103	0.0132	0.4348	Not significant	-0.0544	0.0502	0.2784	Not significant	0.0039	0.0034	0.2558	Not significant	1.0062	0.0062	0.3238	Not significant	0.9754	0.0181	0.1675	Not significant	-0.0021	0.0023	0.358	Not significant	0.0177	0.01	0.0758	Not significant
rs857691	0.0051	0.0089	0.5647	Not significant	-0.0099	0.019	0.601	Not significant	0.0536	0.0756	0.4784	Not significant	0.0021	0.0034	0.5316	Not significant	0.9959	0.0058	0.4753	Not significant	1.0036	0.0209	0.864	Not significant	0.0006	0.0027	0.8154	Not significant	-0.0146	0.0115	0.2047	Not significant
rs9604573	0.0027	0.0087	0.7586	Not significant	0.0064	0.0219	0.7695	Not significant	0.0265	0.0684	0.6987	Not significant	-0.0011	0.0031	0.722	Not significant	1.0038	0.0074	0.6043	Not significant	1.0386	0.0204	0.06256	Not significant	0.002	0.0027	0.4411	Not significant	-0.0173	0.0113	0.1275	Not significant
rs9818758	-0.0112	0.0102	0.269	Not significant	-0.0087	0.0125	0.4853	Not significant	-0.0516	0.0497	0.2992	Not significant	0.0042	0.0042	0.3089	Not significant	0.9945	0.0059	0.3503	Not significant	1.0314	0.0237	0.1916	Not significant	0.0003	0.0031	0.9325	Not significant	0.0013	0.0132	0.9238	Not significant
rs9914988	0.0001	0.0095	0.9892	Not significant	0.0007	0.0176	0.9669	Not significant	-0.0009	0.0556	0.9873	Not significant	0	0.0033	0.9891	Not significant	0.9996	0.0061	0.9529	Not significant	0.9809	0.0221	0.3833	Not significant	0.0029	0.0029	0.3216	Not significant	0.0154	0.0123	0.2095	Not significant
Note. BMI= body mass index, SBP= systolic blood pressure, OR= odds ratio, BH-significance=Benjamini-Hochberg false discovery rate of 0.25.

## Sheet: RT_SNPs_confounders
ESM Table 5 - Associations between 43 reaction time SNPs and confounders
	Deprivation				BMI				SBP				Total cholesterol				Smoking				Stroke				Triglycerides				CRP
SNP	Beta	SE	P-value	BH-significance	Beta	SE	P-value	BH-significance	Beta	SE	P-value	BH-significance	Beta	SE	P-value	BH-significance	OR	SE	P-value	BH-significance	OR	SE	P-value	BH-significance	Beta	SE	P-value	BH-significance	Beta	SE	P-value	BH-significance
rs10125715	0.0019	0.0087	0.8293	Not significant	-0.0061	0.0126	0.6257	Not significant	0.031	0.0554	0.5762	Not significant	-0.0015	0.003	0.6224	Not significant	0.9964	0.0057	0.5264	Not significant	0.9964	0.0205	0.8618	Not significant	-0.0023	0.0026	0.3873	Not significant	-0.0199	0.0113	0.07774	Not significant
rs1032501	0.017	0.0078	0.03065	Not significant	-0.0307	0.0138	0.02639	Not significant	-0.1035	0.0502	0.03928	Not significant	-0.0125	0.0051	0.0138	Not significant	0.9791	0.0096	0.02698	Not significant	1.0397	0.0183	0.03372	Not significant	-0.0012	0.0024	0.603	Not significant	-0.0072	0.0102	0.4783	Not significant
rs1054442	-0.001	0.0079	0.8968	Not significant	-0.0031	0.0129	0.8114	Not significant	-0.0115	0.0568	0.8397	Not significant	-0.0006	0.003	0.8442	Not significant	1.0018	0.0057	0.7502	Not significant	1.021	0.0185	0.262	Not significant	-0.0009	0.0024	0.7071	Not significant	-0.0128	0.0102	0.2131	Not significant
rs10775404	-0.0048	0.0099	0.6291	Not significant	-0.0114	0.0133	0.3915	Not significant	-0.0465	0.052	0.371	Not significant	-0.0026	0.0038	0.4977	Not significant	1.0059	0.0057	0.3063	Not significant	0.9931	0.0232	0.7657	Not significant	-0.0002	0.003	0.9541	Not significant	-0.024	0.0128	0.06024	Not significant
rs10804171	-0.0137	0.0153	0.369	Not significant	0.0135	0.0139	0.3317	Not significant	-0.0588	0.0502	0.2415	Not significant	-0.0035	0.0031	0.264	Not significant	0.9928	0.0058	0.2146	Not significant	1.0366	0.0363	0.3224	Not significant	0.0003	0.0046	0.9457	Not significant	-0.0056	0.0198	0.778	Not significant
rs10911301	-0.0118	0.0077	0.1267	Not significant	0.0217	0.0142	0.1262	Not significant	0.0917	0.0509	0.07166	Not significant	-0.0067	0.0034	0.04769	Not significant	0.9905	0.0063	0.1276	Not significant	0.9767	0.0181	0.1931	Not significant	0.007	0.0023	0.002802	Significant	0.0212	0.01	0.0334	Not significant
rs11205668	-0.0079	0.0077	0.3042	Not significant	0.0192	0.015	0.2009	Not significant	0.0706	0.0498	0.1565	Not significant	0.005	0.004	0.2109	Not significant	0.9907	0.0072	0.194	Not significant	1.0045	0.0181	0.8058	Not significant	-0.0001	0.0023	0.9564	Not significant	-0.0158	0.01	0.1136	Not significant
rs13219424	0.001	0.0084	0.9058	Not significant	-0.0021	0.0126	0.8688	Not significant	-0.0097	0.0566	0.8644	Not significant	0.0006	0.0031	0.8515	Not significant	0.9983	0.0057	0.7599	Not significant	1.0002	0.0196	0.9939	Not significant	-0.0031	0.0025	0.225	Not significant	-0.0095	0.0108	0.3797	Not significant
rs1351848	-0.0074	0.0077	0.3391	Not significant	-0.0156	0.0128	0.223	Not significant	0.0646	0.0519	0.2135	Not significant	-0.0049	0.0043	0.2479	Not significant	1.0087	0.0068	0.2049	Not significant	0.9944	0.0182	0.7561	Not significant	-0.0027	0.0023	0.2582	Not significant	-0.0147	0.01	0.1412	Not significant
rs1385253	-0.0135	0.0092	0.143	Not significant	-0.025	0.017	0.1417	Not significant	0.0957	0.0578	0.09786	Not significant	-0.0102	0.006	0.09218	Not significant	1.0118	0.0077	0.1286	Not significant	0.9995	0.0216	0.9831	Not significant	0.0012	0.0028	0.6657	Not significant	0.0118	0.0119	0.3238	Not significant
rs1503043	0.0091	0.0081	0.258	Not significant	0.0172	0.0125	0.1707	Not significant	0.0788	0.0541	0.1454	Not significant	-0.0051	0.0039	0.1946	Not significant	0.9907	0.0068	0.1703	Not significant	0.9797	0.019	0.2812	Not significant	0.0044	0.0025	0.07224	Not significant	0.0172	0.0105	0.0993	Not significant
rs16822665	-0.0007	0.0083	0.9372	Not significant	0.0024	0.0165	0.8842	Not significant	-0.0075	0.0658	0.9094	Not significant	-0.0006	0.0051	0.9063	Not significant	1.0013	0.006	0.8244	Not significant	1.0035	0.0196	0.8581	Not significant	0.0036	0.0025	0.1554	Not significant	-0.0118	0.0108	0.2739	Not significant
rs16959783	-0.0005	0.0091	0.9585	Not significant	0.0023	0.0161	0.8873	Not significant	0.0033	0.0501	0.9475	Not significant	0.0003	0.0032	0.9173	Not significant	1.0009	0.0063	0.8855	Not significant	0.9834	0.0214	0.4338	Not significant	0.004	0.0028	0.1491	Not significant	0.0194	0.0117	0.09796	Not significant
rs1734197	-0.0028	0.0077	0.7171	Not significant	-0.0075	0.0126	0.5493	Not significant	0.0673	0.0991	0.4975	Not significant	0.0018	0.003	0.5513	Not significant	0.9959	0.0059	0.4847	Not significant	0.9894	0.018	0.5559	Not significant	0.0039	0.0023	0.09702	Not significant	0.0189	0.0099	0.05784	Not significant
rs2040879	-0.0047	0.0101	0.643	Not significant	0.0146	0.0176	0.4078	Not significant	0.043	0.0505	0.3936	Not significant	0.0021	0.0031	0.4989	Not significant	0.9913	0.0103	0.3945	Not significant	1.0024	0.0238	0.9208	Not significant	0.0035	0.0031	0.2616	Not significant	0.0031	0.0131	0.8151	Not significant
rs2604268	0.0133	0.0087	0.1257	Not significant	-0.0246	0.0157	0.1156	Not significant	-0.1116	0.0588	0.0577	Not significant	-0.0068	0.0034	0.04682	Not significant	1.0119	0.0075	0.1156	Not significant	1.0116	0.0205	0.5741	Not significant	0.0035	0.0026	0.1822	Not significant	0.0227	0.0113	0.04409	Not significant
rs264979	0.0022	0.0077	0.7756	Not significant	0.0099	0.0166	0.5505	Not significant	0.045	0.0686	0.5118	Not significant	-0.0019	0.0033	0.5548	Not significant	0.9963	0.0057	0.517	Not significant	1.0271	0.018	0.1378	Not significant	0.0013	0.0023	0.5679	Not significant	0.0076	0.0099	0.4472	Not significant
rs2869529	0.0112	0.0079	0.1556	Not significant	0.0211	0.0148	0.1527	Not significant	-0.0833	0.0514	0.1047	Not significant	-0.0059	0.0036	0.1011	Not significant	0.9892	0.0073	0.1385	Not significant	0.9958	0.0186	0.82	Not significant	0.0012	0.0024	0.6147	Not significant	0.0023	0.0102	0.8228	Not significant
rs323299	-0.0045	0.008	0.5738	Not significant	0.0184	0.021	0.3809	Not significant	-0.0471	0.0524	0.3685	Not significant	0.0027	0.0038	0.4855	Not significant	1.0079	0.0075	0.2966	Not significant	0.9573	0.019	0.02115	Not significant	-0.0016	0.0024	0.5116	Not significant	0.005	0.0104	0.6321	Not significant
rs35066740	0.0172	0.0096	0.07314	Not significant	-0.0273	0.0136	0.04499	Not significant	0.1223	0.0597	0.04057	Not significant	0.0073	0.0032	0.02146	Not significant	1.0282	0.0127	0.02815	Not significant	0.98	0.0227	0.3744	Not significant	-0.0011	0.0029	0.7005	Not significant	0.0232	0.0125	0.06309	Not significant
rs4627212	0.0067	0.0085	0.4322	Not significant	0.0123	0.0129	0.3373	Not significant	-0.0529	0.0498	0.2878	Not significant	-0.0033	0.004	0.4067	Not significant	0.9895	0.0096	0.2696	Not significant	1.0101	0.0199	0.6129	Not significant	-0.0046	0.0026	0.07378	Not significant	-0.0018	0.011	0.8673	Not significant
rs4673905	-0.0005	0.0082	0.9548	Not significant	0.0031	0.021	0.8842	Not significant	0.005	0.0499	0.9206	Not significant	0.0003	0.0031	0.9096	Not significant	0.9988	0.0057	0.8352	Not significant	1.0315	0.0191	0.1049	Not significant	-0.0015	0.0025	0.5556	Not significant	-0.0097	0.0106	0.3597	Not significant
rs4852778	0.0096	0.0077	0.2141	Not significant	-0.02	0.0142	0.1598	Not significant	-0.0747	0.0512	0.145	Not significant	-0.0092	0.0068	0.1742	Not significant	0.9914	0.0062	0.1618	Not significant	0.9995	0.0182	0.9784	Not significant	0.0032	0.0023	0.1796	Not significant	0.0055	0.01	0.5818	Not significant
rs4946935	-0.0004	0.0085	0.9603	Not significant	-0.0013	0.0132	0.92	Not significant	-0.0036	0.0565	0.9489	Not significant	0.0002	0.0034	0.9488	Not significant	0.9992	0.0066	0.901	Not significant	0.9925	0.02	0.7059	Not significant	-0.0004	0.0026	0.8869	Not significant	0.0021	0.0111	0.8516	Not significant
rs56335290	-0.0013	0.0092	0.8886	Not significant	-0.0035	0.0145	0.8112	Not significant	-0.0197	0.0836	0.8136	Not significant	0.0006	0.0031	0.843	Not significant	0.9975	0.0059	0.6731	Not significant	1.0125	0.0216	0.5644	Not significant	0.0018	0.0028	0.5127	Not significant	-0.007	0.012	0.5564	Not significant
rs568039055	-0.0018	0.0108	0.8656	Not significant	0.0047	0.013	0.7208	Not significant	-0.0573	0.1116	0.6076	Not significant	0.001	0.0034	0.7754	Not significant	1.0039	0.0071	0.5808	Not significant	0.9879	0.0255	0.6331	Not significant	-0.0005	0.0033	0.871	Not significant	-0.018	0.014	0.1991	Not significant
rs58984824	0.0039	0.0106	0.7102	Not significant	-0.0139	0.0227	0.5407	Not significant	-0.0444	0.064	0.4878	Not significant	-0.0026	0.0042	0.5413	Not significant	1.0046	0.0063	0.4673	Not significant	0.9469	0.0253	0.03083	Not significant	0.002	0.0032	0.5276	Not significant	0.0086	0.0137	0.5289	Not significant
rs61786416	0.0106	0.0129	0.4094	Not significant	0.0135	0.0139	0.3344	Not significant	0.0589	0.053	0.2663	Not significant	-0.0028	0.0032	0.3936	Not significant	0.9931	0.0057	0.2213	Not significant	0.9931	0.0303	0.8194	Not significant	-0.0025	0.0039	0.525	Not significant	-0.0043	0.0167	0.7975	Not significant
rs62074125	-0.011	0.0088	0.2107	Not significant	0.0194	0.0136	0.1544	Not significant	-0.0796	0.05	0.1115	Not significant	-0.0042	0.0031	0.17	Not significant	1.0086	0.006	0.1583	Not significant	1.0099	0.0205	0.6315	Not significant	-0.0012	0.0027	0.6627	Not significant	-0.009	0.0114	0.4301	Not significant
rs648997	-0.0015	0.0089	0.8639	Not significant	-0.006	0.013	0.6463	Not significant	0.03	0.0555	0.5888	Not significant	0.001	0.0034	0.7652	Not significant	0.9965	0.0057	0.5394	Not significant	1.0314	0.0208	0.1365	Not significant	0.0025	0.0027	0.3495	Not significant	-0.0023	0.0115	0.8441	Not significant
rs66534382	0.0015	0.0097	0.8739	Not significant	-0.0045	0.0158	0.7745	Not significant	0.029	0.0629	0.6454	Not significant	0.001	0.0036	0.7787	Not significant	0.9968	0.0058	0.587	Not significant	0.9827	0.0229	0.4474	Not significant	0.0014	0.0029	0.6356	Not significant	0.0027	0.0126	0.832	Not significant
rs6870103	-0.003	0.0077	0.6925	Not significant	0.0096	0.0143	0.502	Not significant	0.0528	0.066	0.424	Not significant	-0.0022	0.0035	0.53	Not significant	0.9948	0.0072	0.4662	Not significant	0.9825	0.0181	0.3287	Not significant	0.0016	0.0023	0.4853	Not significant	0.0059	0.01	0.555	Not significant
rs7075591	-0.0037	0.008	0.6447	Not significant	0.0089	0.0125	0.4751	Not significant	-0.0401	0.05	0.4232	Not significant	-0.0023	0.0036	0.5252	Not significant	1.0044	0.0057	0.4403	Not significant	1.0316	0.0187	0.09724	Not significant	-0.0001	0.0024	0.962	Not significant	0.0206	0.0104	0.04772	Not significant
rs73464507	0	0.0104	0.9998	Not significant	-0.0003	0.0127	0.9836	Not significant	-0.0034	0.0624	0.957	Not significant	0	0.003	0.9982	Not significant	1.0004	0.0064	0.9494	Not significant	0.9853	0.0246	0.5477	Not significant	0.0015	0.0032	0.6419	Not significant	-0.003	0.0135	0.8269	Not significant
rs75543711	0.0031	0.0139	0.8223	Not significant	-0.013	0.0249	0.6013	Not significant	0.0362	0.0599	0.5453	Not significant	0.0017	0.0032	0.5992	Not significant	0.9949	0.008	0.5212	Not significant	0.9929	0.0327	0.8284	Not significant	0.0066	0.0042	0.1194	Not significant	0.0049	0.018	0.7846	Not significant
rs7598246	0.0012	0.0078	0.8797	Not significant	0.0042	0.0158	0.7924	Not significant	0.0259	0.0629	0.6802	Not significant	-0.0011	0.0041	0.7948	Not significant	1.0034	0.0064	0.6006	Not significant	1.0183	0.0183	0.322	Not significant	-0.0013	0.0024	0.5761	Not significant	-0.0028	0.0101	0.7785	Not significant
rs7783359	0.0012	0.008	0.8805	Not significant	-0.0067	0.028	0.8097	Not significant	0.0207	0.0702	0.768	Not significant	-0.0006	0.0031	0.841	Not significant	1.0027	0.0062	0.6626	Not significant	0.993	0.0188	0.7092	Not significant	-0.0005	0.0024	0.8425	Not significant	0.013	0.0104	0.2108	Not significant
rs77917390	0.0013	0.0129	0.9211	Not significant	0.0019	0.0126	0.8803	Not significant	0.0087	0.0542	0.8722	Not significant	0.0005	0.0035	0.8869	Not significant	1.0014	0.0059	0.809	Not significant	0.9691	0.0307	0.3068	Not significant	-0.0038	0.0039	0.3336	Not significant	-0.0011	0.0167	0.9493	Not significant
rs77998199	0.0061	0.0097	0.5261	Not significant	0.0138	0.015	0.3588	Not significant	-0.071	0.0677	0.2942	Not significant	0.0041	0.0055	0.4535	Not significant	1.0086	0.0078	0.2751	Not significant	0.9911	0.0228	0.6961	Not significant	-0.0004	0.0029	0.8828	Not significant	-0.0135	0.0126	0.2812	Not significant
rs7936413	0.0099	0.0102	0.3326	Not significant	-0.0158	0.0125	0.2059	Not significant	-0.109	0.0837	0.1929	Not significant	-0.0039	0.0032	0.2185	Not significant	0.9858	0.0112	0.204	Not significant	1.0123	0.0238	0.6063	Not significant	-0.0001	0.0031	0.9639	Not significant	-0.0029	0.0132	0.8272	Not significant
rs80054135	0.0264	0.0172	0.1252	Not significant	0.0317	0.0172	0.06581	Not significant	-0.1072	0.055	0.0513	Not significant	-0.0067	0.003	0.02881	Not significant	0.9889	0.0065	0.0861	Not significant	0.9918	0.0407	0.8402	Not significant	0.0064	0.0052	0.22	Not significant	0.0173	0.0223	0.4384	Not significant
rs925229	0.0019	0.0077	0.8042	Not significant	-0.0074	0.0126	0.559	Not significant	0.056	0.0902	0.5349	Not significant	0.0018	0.0033	0.5758	Not significant	0.9957	0.0067	0.519	Not significant	1.0014	0.0181	0.9375	Not significant	-0.0014	0.0023	0.5401	Not significant	-0.0059	0.01	0.5575	Not significant
rs936414	0.0003	0.0086	0.9696	Not significant	0.0007	0.0131	0.9583	Not significant	-0.003	0.0521	0.9538	Not significant	0.0001	0.0038	0.9879	Not significant	0.9995	0.0059	0.9293	Not significant	0.9723	0.0202	0.1655	Not significant	-0.0009	0.0026	0.7163	Not significant	0.0049	0.0111	0.6597	Not significant
Note. BMI= body mass index, SBP= systolic blood pressure, OR= odds ratio, BH-significance=Benjamini-Hochberg false discovery rate of 0.25.

## Sheet: ICD-10 AD codes
ESM Table 6 - ICD-10 codes for Alzheimer's disease (AD) in UK Biobank
ICD-10 code	ICD-10 Code Text
F00	Dementia in Alzheimer's disease
F00.0	Dementia in Alzheimer's disease with early onset
F00.1	Dementia in Alzheimer's disease with late onset
F00.2	Dementia in Alzheimer's disease, atypical or mixed type
F00.9	Dementia in Alzheimer's disease, unspecified
G30	Alzheimer's disease
G30.0	Alzheimer's disease with early onset
G30.1	Alzheimer's disease with late onset
G30.8	Other Alzheimer's disease
G30.9	Alzheimer's disease unspecified

## Sheet: Primary care codes
ESM Table 7 - Primary care Read codes (version 2) for Alzheimer's disease
Code	Description
Eu00.	[X]Dementia in Alzheimer's disease
Eu000	[X]Dementia in Alzheimer's disease with early onset
Eu001	[X}Dementia in Alzheimer's disease with late onset
Eu002	[X]Dementia in Alzheimer's disease, atypical or mixed type
Eu00z	[X]Dementia in Alzheimer's disease, unspecified

## Sheet: Additional diabetes MR analyses
ESM Table 8 - Results from MR IVW, Egger and WME with a 77-SNP diabetes instrument with no overlapping samples
Diabetes	Outcome: Reaction time	Outcome: Visual memory	Outcome: HV	Outcome: WMHV	Outcome: AD
	exp(β) (95% CI)	exp(β) (95% CI)	β (95% CI)	exp(β) (95% CI)	OR (95% CI)
IVW	1.00 (1.00;1.00)	1.00 (0.98;1.01)	34.81 (1.80;67.82)	1.00 (0.93;1.07)	0.80 (0.52;1.25)
MR-Egger	1.00 (1.00;1.01)	0.99 (0.97;1.01)	34.66 (-22.27;91.59)	1.01 (0.97;1.05)	0.73 (0.34;1.55)
WME	1.00 (1.00;1.01)	0.99 (0.97;1.01)	24.70 (-25.04;74.44)	0.97 (0.87;1.07)	0.72 (0.35;1.46)
Egger intercept p-value	0.739	0.481	0.995	0.275	0.762
Note. Weights used from Mahajan et al., 2014 GWAS to ensure no sample overlap (UKB was not included in this GWAS); IVW= inverse variance weighted, WME= weighted median estimator, HV=mm3

## Sheet: MR_adjusted_10_PCs
ESM Table 9 - Results from MR IVW, Egger and WME analyses adjusted for 10 principal components
HbA1c (51 SNPs)	Outcome: Reaction time	Outcome: Visual memory	Outcome: HV	Outcome: WMHV	Outcome: AD
	exp(β) (95% CI)	exp(β) (95% CI)	β (95% CI)	exp(β) (95% CI)	OR (95% CI)
IVW	1.00 (0.99;1.01)	1.00 (0.97;1.03)	-25.93 (-87.11;35.24)	1.07 (0.93;1.23)	1.67 (0.65;4.26)
MR-Egger	1.00 (0.98;1.01)	0.98 (0.92;1.03)	-67.37 (-181.54;46.80)	1.08 (0.83;1.42)	1.08 (0.19;6.30)
WME	1.00 (0.99;1.01)	0.99 (0.94;1.04)	2.01 (-88.31;92.31)	1.06 (0.84;1.34)	1.48 (0.33;6.62)
Egger intercept p-value	0.551	0.253	0.4	0.928	0.571
HbA1c (16 glycaemic SNPs)	Outcome: Reaction time	Outcome: Visual memory	Outcome: HV	Outcome: WMHV
	exp(β) (95% CI)	exp(β) (95% CI)	β (95% CI)	exp(β) (95% CI)
IVW	1.00 (0.98;1.01)	1.00 (0.94;1.05)	-33.98 (-152.05;84.10)	1.02 (0.72;1.43)
MR-Egger	0.98 (0.94;1.02)	0.93 (0.80;1.09)	-55.92 (-361.94;250.10)	1.19 (0.47;3.00)
WME	1.00 (0.98;1.02)	0.98 (0.91;1.06)	-1.54 (-166.24;163.15)	0.80 (0.54;1.19)
Egger intercept p-value	0.377	0.388	0.879	0.73
HbA1c (19 erythrocytic SNPs)	Outcome: Reaction time	Outcome: Visual memory	Outcome: HV	Outcome: WMHV
	exp(β) (95% CI)	exp(β) (95% CI)	β (95% CI)	exp(β) (95% CI)
IVW	1.00 (0.99;1.01)	1.01 (0.97;1.05)	23.74 (-112.15;64.68)	1.12 (0.91;1.36)
MR-Egger	1.00 (0.98;1.01)	0.99 (0.92;1.06)	-106.99 (-247.88;33.90)	1.03 (0.74;1.43)
WME	1.00 (0.98;1.01)	0.99 (0.94;1.04)	-68.77 (-191.69;54.13)	1.08 (0.84;1.42)
Egger intercept p-value	0.567	0.45	0.137	0.544
Diabetes (157 SNPs)	Outcome: Reaction time	Outcome: Visual memory	Outcome: HV	Outcome: WMHV	Outcome: AD
	exp(β) (95% CI)	exp(β) (95% CI)	β (95% CI)	exp(β) (95% CI)	OR (95% CI)
IVW	1.00 (1.00;1.00)	1.00 (1.00;1.00)	-0.64 (-9.22;7.95)	1.00 (0.98;1.02)	1.00 (0.88;1.14)
MR-Egger	1.00 (1.00;1.00)	1.00 (0.99;1.01)	4.48 (-14.78;23.74)	1.00 (1.00;1.00)	0.96 (0.73;1.27)
WME	1.00 (1.00;1.00)	1.00 (0.99;1.00)	7.08 (-7.25;21.40)	0.99 (0.96;1.03)	0.97 (0.79;1.21)
Egger intercept p-value	0.108	0.431	0.56	0.473	0.731
Reaction time (43 SNPs)	Outcome: HbA1c	Outcome: Diabetes
	β (95% CI)	exp(β) (95% CI)
IVW	-0.10 (-0.60;0.39)	0.94 (0.63;1.39)
MR-Egger	-1.43 (-5.46;2.60)	0.59 (0.02;13.87)
MR-Egger SIMEX	-3.17 (-8.16;1.82)	0.30 (0.04;2.20)
WME	-0.32 (-1.00;0.35)	0.93 (0.57;1.52)
Egger intercept p-value	0.516	0.773
Egger SIMEX intercept p-value	0.253	0.222
